# Supplementary material
Source: Royal Society of Chemistry journal article supplement (doi:10.1039/d6nj00925e)
Supplement: d6nj00925e2.pdf [file d6nj00925e2.pdf]

# Supporting Information

## For

### Stereoselective One-Pot Synthesis of Spiro-Indenoquinoline– Pyrrolidine Hybrids: Structural Elucidation and Biological Evaluation

Rameshbabu Ajaydev<sup>a</sup>, Wilson Joy<sup>b</sup>, Aravind Krishnan<sup>c</sup>, and Sivakumar Shanmugam<sup>a\*</sup>

<sup>a</sup>Department of Organic Chemistry, School of Chemistry, Madurai Kamaraj University, Madurai, India

<sup>b</sup>Department of Molecular Biology, School of Biological Sciences, Madurai Kamaraj University, Madurai, India

<sup>c</sup>Department of Chemistry, Saint Berchmans College, Changanassery, Kerala, 686101, India

Email: [sivakumar.chemistry@mkuniversity.ac.in](mailto:sivakumar.chemistry@mkuniversity.ac.in)

| S. No. | Table of Contents                                                                                                                                                  | Page no. |
|--------|--------------------------------------------------------------------------------------------------------------------------------------------------------------------|----------|
| 1.     | Spectroscopic data of new compounds                                                                                                                                | S1       |
| 2.     | Scanned copies of spectra ( <sup>1</sup> H, <sup>13</sup> C, DEPT-135, <sup>13</sup> C- <sup>1</sup> H, <sup>1</sup> H- <sup>1</sup> H, HMBC NMR, FT-IR, and HRMS) | S5       |
| 3.     | Biological Data Table of Compound <b>6f</b> , <b>g</b> , and <b>h</b> .                                                                                            | S34      |
| 4.     | Docking Results of compound <b>6g</b>                                                                                                                              | S34      |
| 5.     | DFT results of Compound <b>6g</b>                                                                                                                                  | S35      |
| 6.     | Basic Crystallographic data of Compound <b>6g</b>                                                                                                                  | S37      |
| 7.     | References                                                                                                                                                         | S41      |

## 1. Spectroscopic data of new compounds

|                                                                                                                                  |                                                                                                                                                                                                                                                                                                                                                                                                                                                                                                                                                                                                                                                                                                                                                                                                                                                                                                                                                                                                                                                                                                                                                                                                                                                                                                                                                                                                                                                                                                          |
|----------------------------------------------------------------------------------------------------------------------------------|----------------------------------------------------------------------------------------------------------------------------------------------------------------------------------------------------------------------------------------------------------------------------------------------------------------------------------------------------------------------------------------------------------------------------------------------------------------------------------------------------------------------------------------------------------------------------------------------------------------------------------------------------------------------------------------------------------------------------------------------------------------------------------------------------------------------------------------------------------------------------------------------------------------------------------------------------------------------------------------------------------------------------------------------------------------------------------------------------------------------------------------------------------------------------------------------------------------------------------------------------------------------------------------------------------------------------------------------------------------------------------------------------------------------------------------------------------------------------------------------------------|
| 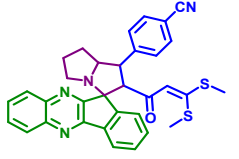 <p style="text-align: center;"><b>6a</b></p>   | <p><b>Nature:</b> Mild Yellow solid<br/> <b>Yield:</b> 69%<br/> <b>R<sub>f</sub></b> (30% EtOAc-Hexane): 0.45<br/> <b>Mp:</b> 274-276 °C<br/> <b><sup>1</sup>H NMR</b> (400 MHz, CDCl<sub>3</sub>) δ 8.33 – 8.28 (m, 1H), 8.16 – 8.11 (m, 2H), 7.78 – 7.74 (m, 2H), 7.70 (d, <i>J</i> = 8.3 Hz, 2H), 7.66 – 7.60 (m, 3H), 7.57 – 7.49 (m, 2H), 4.65 (d, <i>J</i> = 11.7 Hz, 1H), 4.55 (s, 1H), 4.35 (dt, <i>J</i> = 9.3, 7.1 Hz, 1H), 4.14 (dd, <i>J</i> = 11.7, 9.4 Hz, 1H), 2.66 – 2.40 (m, 3H), 2.12 (s, 3H), 2.02 – 1.91 (m, 2H), 1.86 – 1.73 (m, 2H), 1.13 (s, 3H) ppm. (<b>Fig. S1</b>)<br/> <b><sup>13</sup>C NMR</b> (100.6 MHz, CDCl<sub>3</sub>) δ 188.1, 165.3, 164.7, 153.6, 146.6, 143.8, 142.8, 142.2, 137.4, 132.4, 131.3, 129.9, 129.7, 129.7, 129.1, 129.1, 128.9, 127.7, 122.2, 119.0, 111.1, 110.5, 75.7, 72.7, 69.5, 51.84, 47.69, 31.5, 28.1, 15.6, 14.6 ppm (<b>Fig. S2</b>)<br/> <b>DEPT-135</b> (100.6 MHz, CDCl<sub>3</sub>) δ 132.4, 131.4, 129.9, 129.8, 129.7, 129.2, 129.1, 129.0, 127.8, 122.3, 111.2, 72.7, 69.6, 51.8, 47.6, 28.1, 15.6, 14.6 ppm. (<b>Fig. S3</b>)<br/> <b>FT-IR (KBr) u<sub>max</sub></b> = 1639.53 (C=O), 1494.83 (C=C), 1105.94 (=C-H) cm<sup>-1</sup>. (<b>Fig. S4</b>)<br/> <b>HRMS (ESI):</b> Calcd for C<sub>33</sub>H<sub>28</sub>N<sub>4</sub>OS<sub>2</sub> (M+H)<sup>+</sup> <i>m/z</i> = 560.1705; Found 561.1786. (<b>Fig. S5</b>)</p>                                                                                                     |
|  <p style="text-align: center;"><b>6b</b></p> | <p><b>Nature:</b> Light Green solid<br/> <b>Yield:</b> 70%<br/> <b>R<sub>f</sub></b> (30% EtOAc-Hexane): 0.33<br/> <b>Mp:</b> 270-271 °C<br/> <b><sup>1</sup>H NMR</b> (400 MHz, CDCl<sub>3</sub>) δ 8.37 – 8.27 (m, 1H), 8.12 (d, <i>J</i> = 7.1 Hz, 2H), 7.73 (ddd, <i>J</i> = 10.1, 4.1, 3.0 Hz, 2H), 7.69 (s, 1H), 7.58 – 7.43 (m, 4H), 6.87 (d, <i>J</i> = 8.7 Hz, 2H), 4.61 (d, <i>J</i> = 4.8 Hz, 1H), 4.34 (dt, <i>J</i> = 9.1, 7.1 Hz, 1H), 4.03 (dd, <i>J</i> = 11.8, 9.4 Hz, 1H), 3.77 (s, 3H), 2.63–2.44 (m, 3H), 2.09 (s, 3H), 2.03–1.74 (m, 5H), 1.12 (s, 3H) ppm. (<b>Fig. S6</b>)<br/> <b><sup>13</sup>C NMR</b> (100.6 MHz, CDCl<sub>3</sub>) δ 188.8, 165.2, 163.9, 158.4, 153.7, 144.3, 142.8, 142.3, 137.4, 132.7, 131.2, 129.8, 129.7, 129.5, 129.4, 129.2, 128.9, 128.9, 127.9, 122.1, 114.0, 112.9, 111.8, 75.9, 73.0, 69.8, 55.2, 51.0, 47.7, 31.6, 28.2, 15.5, 14.6 ppm. (<b>Fig. S7</b>)<br/> <b>DEPT-135</b> (100.6 MHz, CDCl<sub>3</sub>) δ 131.3, 129.9, 129.7, 129.5, 129.5, 129.2, 128.9, 128.9, 128.0, 122.1, 114.0, 113.0, 111.8, 73.1, 69.9, 55.3, 51.0, 47.8, 31.7, 28.2, 17.3, 15.6, 14.9, 14.6 ppm. (<b>Fig. S8</b>)<br/> <b>FT-IR (KBr) u<sub>max</sub></b> = 1644.18 (C=O), 1485.91 (C=C), 1244.62 (=C-H) cm<sup>-1</sup>. (<b>Fig. S9</b>)<br/> <b>HRMS (ESI):</b> Calcd for C<sub>33</sub>H<sub>31</sub>N<sub>3</sub>O<sub>2</sub>S<sub>2</sub> (M+H)<sup>+</sup> <i>m/z</i> = 565.1858; Found 566.1844. (<b>Fig. S10</b>)</p>                                  |
|  <p style="text-align: center;"><b>6c</b></p> | <p><b>Nature:</b> Sandal yellow solid<br/> <b>Yield:</b> 72%<br/> <b>R<sub>f</sub></b> (25% EtOAc-Hexane): 0.30<br/> <b>Mp:</b> 255-257 °C<br/> <b><sup>1</sup>H NMR</b> (400 MHz, CDCl<sub>3</sub>) δ 8.36 – 8.29 (m, 1H), 8.12 (d, <i>J</i> = 8.3 Hz, 2H), 7.79 – 7.70 (m, 3H), 7.55 (t, <i>J</i> = 7.5 Hz, 1H), 7.48 (t, <i>J</i> = 7.4 Hz, 1H), 7.40 (d, <i>J</i> = 9.0 Hz, 1H), 6.47 (d, <i>J</i> = 6.9 Hz, 2H), 4.97 (d, <i>J</i> = 12.3 Hz, 1H), 4.79 (s, 1H), 4.40 (dd, <i>J</i> = 12.2, 9.4 Hz, 1H), 4.28 – 4.18 (m, 1H), 3.94 (s, 3H), 3.77 (s, 3H), 2.53 – 2.43 (m, 2H), 2.07 (s, 3H), 1.97 – 1.85 (m, 4H), 1.22 (s, 3H) ppm. (<b>Fig. S11</b>)<br/> <b><sup>13</sup>C NMR</b> (100.6 MHz, CDCl<sub>3</sub>) δ 189.4, 165.4, 163.5, 159.4, 158.9, 153.8, 144.7, 142.8, 142.3, 137.5, 131.2, 129.9, 129.5, 129., 128.89, 128.7, 128.7, 127.8, 122.1, 121.0, 111.8, 104.4, 98.9, 75.8, 72.2, 67.1, 55.7, 55.3, 47.6, 45.1, 31.8, 28.2, 15.6, 14.6 ppm. (<b>Fig. S12</b>)<br/> <b>DEPT-135</b> (100.6 MHz, CDCl<sub>3</sub>) δ 131.2, 129.9, 129.6, 129.3, 128.9, 128.8, 128.8, 127.9, 122.1, 111.9, 104.4, 98.9, 72.3, 67.1, 55.7, 55.3, 45.1, 15.6, 14.6 ppm. (<b>Fig. S13</b>)<br/> <b>FT-IR (KBr) u<sub>max</sub></b> = 1638.99 (C=O), 1488.51 (C=C), 1137.06 (=C-H) cm<sup>-1</sup>. (<b>Fig. S14</b>)<br/> <b>HRMS (ESI):</b> Calcd for C<sub>34</sub>H<sub>33</sub>N<sub>3</sub>O<sub>3</sub>S<sub>2</sub> (M+H)<sup>+</sup> <i>m/z</i> = 595.1963; Found 596.2013. (<b>Fig. S15</b>)</p> |

|                                                                                                                                  |                                                                                                                                                                                                                                                                                                                                                                                                                                                                                                                                                                                                                                                                                                                                                                                                                                                                                                                                                                                                                                                                                                                                                                                                                                                                                                                                                                                                                                                                                                                                  |
|----------------------------------------------------------------------------------------------------------------------------------|----------------------------------------------------------------------------------------------------------------------------------------------------------------------------------------------------------------------------------------------------------------------------------------------------------------------------------------------------------------------------------------------------------------------------------------------------------------------------------------------------------------------------------------------------------------------------------------------------------------------------------------------------------------------------------------------------------------------------------------------------------------------------------------------------------------------------------------------------------------------------------------------------------------------------------------------------------------------------------------------------------------------------------------------------------------------------------------------------------------------------------------------------------------------------------------------------------------------------------------------------------------------------------------------------------------------------------------------------------------------------------------------------------------------------------------------------------------------------------------------------------------------------------|
| 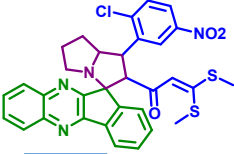 <p style="text-align: center;"><b>6d</b></p>   | <p><b>Nature:</b> Sandal yellow solid<br/> <b>Yield:</b> 70%<br/> <b>R<sub>f</sub></b> (30% EtOAc-Hexane): 0.38<br/> <b>Mp:</b> 242-245 °C<br/> <b><sup>1</sup>H NMR</b> (400 MHz, CDCl<sub>3</sub>) δ 8.79 (d, <i>J</i> = 2.7 Hz, 1H), 8.48 – 8.40 (m, 1H), 8.15 (ddd, <i>J</i> = 7.1, 3.5, 2.0 Hz, 2H), 8.03 – 7.99 (m, 1H), 7.81 – 7.76 (m, 2H), 7.72 (d, <i>J</i> = 7.4 Hz, 1H), 7.57 (d, <i>J</i> = 8.7 Hz, 2H), 7.54 – 7.50 (m, 1H), 4.76 (d, <i>J</i> = 11.4 Hz, 1H), 4.68 (s, 1H), 4.30 (dt, <i>J</i> = 9.6, 6.1 Hz, 1H), 2.76 – 2.69 (m, 1H), 2.59 – 2.49 (m, 2H), 2.14 (s, 3H), 2.08 – 2.00 (m, 2H), 2.00 – 1.86 (m, 3H), 1.24 (s, 3H) ppm. (<b>Fig. S16</b>)<br/> <b><sup>13</sup>C NMR</b> (100.6 MHz, CDCl<sub>3</sub>) δ 188.3, 165.3, 164.7, 153.4, 147.0, 143.8, 142.9, 142.1, 142.0, 140.9, 137.6, 131.4, 130.7, 130.0, 129.8, 129.2, 128.9, 127.7, 123.7, 122.5, 122.2, 111.4, 75.3, 73.4, 68.9, 47.8, 46.9, 30.6, 27.6, 15.8, 14.5 ppm. (<b>Fig. S17</b>)<br/> <b>DEPT-135</b> (100.6 MHz, CDCl<sub>3</sub>) δ 131.5, 130.7, 130.0, 129.8, 129.3, 128.9, 127.8, 123.7, 122.5, 122.3, 111.4, 73.4, 69.0, 47.8, 46.9, 30.7, 27.7, 15.8, 14.6 ppm. (<b>Fig. S18</b>)<br/> <b>FT-IR (KBr) u<sub>max</sub></b> = 1517.04 (C=O), 1483.32 (C=C) cm<sup>-1</sup>. (<b>Fig. S19</b>)<br/> <b>HRMS (ESI):</b> Calcd for C<sub>32</sub>H<sub>27</sub>ClN<sub>4</sub>O<sub>3</sub>S<sub>2</sub> (M+H) m/z = 615.1630; Found 615.1249. (<b>Fig. S20</b>)</p>                                                               |
|  <p style="text-align: center;"><b>6e</b></p>  | <p><b>Nature:</b> Brown solid<br/> <b>Yield:</b> 80%<br/> <b>R<sub>f</sub></b> (30% EtOAc-Hexane): 0.30<br/> <b>Mp:</b> 277-278 °C<br/> <b><sup>1</sup>H NMR</b> (400 MHz, CDCl<sub>3</sub>) δ 8.35 – 8.29 (m, 1H), 8.13 (d, <i>J</i> = 9.1 Hz, 2H), 7.75 – 7.69 (m, 3H), 7.60 – 7.54 (m, 2H), 7.49 (s, 1H), 7.21 – 7.14 (m, 1H), 7.12 – 7.06 (m, 1H), 7.05 (d, <i>J</i> = 8.3 Hz, 1H), 4.90 (d, <i>J</i> = 12.0 Hz, 1H), 4.68 (s, 1H), 4.40 (dd, <i>J</i> = 11.9, 9.4 Hz, 1H), 4.34 – 4.24 (m, 1H), 2.51 (dd, <i>J</i> = 6.7, 4.2 Hz, 1H), 2.45 (s, 1H), 2.08 (s, 3H), 1.94 – 1.80 (m, 4H), 1.17 (s, 3H) ppm. (<b>Fig. S21</b>)<br/> <b><sup>13</sup>C NMR</b> (100.6 MHz, CDCl<sub>3</sub>) δ 188.53, 165.02, 164.40, 153.75, 144.26, 142.84, 142.33, 137.50, 131.40, 129.91, 129.76, 129.55, 129.11, 129.06, 128.95, 128.90, 128.15, 128.06, 127.84, 127.45, 124.33, 122.21, 115.86, 115.64, 111.35, 75.81, 72.22, 67.62, 47.67, 44.87, 31.71, 28.23, 15.59, 14.59 ppm. (<b>Fig. S22</b>)<br/> <b>DEPT-135</b> (100.6 MHz, CDCl<sub>3</sub>) δ 131.4, 129.9, 129.8, 129.6, 129.1, 129.1, 129.0, 128.9, 128.1, 128.1, 127.8, 124.3, 122.2, 115.9, 115.6, 111.4, 72.2, 67.6, 47.7, 44.9, 31.7, 28.2, 15.6, 14.6 ppm. (<b>Fig. S23</b>)<br/> <b>FT-IR (KBr) u<sub>max</sub></b> = 1641.58 (C=O), 1483.32 (C=C), 754.26 (-F) cm<sup>-1</sup>. (<b>Fig. S24</b>)</p>                                                                                                                                                               |
|  <p style="text-align: center;"><b>6f</b></p> | <p><b>Nature:</b> Yellowish solid<br/> <b>Yield:</b> 74%<br/> <b>R<sub>f</sub></b> (30% EtOAc-Hexane): 0.30<br/> <b>Mp:</b> 277-279 °C<br/> <b><sup>1</sup>H NMR</b> (400 MHz, CDCl<sub>3</sub>) δ 8.72 (d, <i>J</i> = 8.5 Hz, 1H), 8.39 – 8.33 (m, 1H), 8.17 (d, <i>J</i> = 5.1 Hz, 1H), 8.16 – 8.14 (m, 1H), 7.94 (d, <i>J</i> = 6.9 Hz, 1H), 7.89 – 7.83 (m, 2H), 7.78 – 7.72 (m, 4H), 7.67 – 7.62 (m, 2H), 7.53 – 7.47 (m, 3H), 5.03 (d, <i>J</i> = 8.5 Hz, 1H), 4.69 (s, 1H), 4.50 – 4.44 (m, 1H), 2.70 – 2.63 (m, 1H), 2.59 – 2.53 (m, 1H), 2.06 (s, 3H), 1.92 (td, <i>J</i> = 9.6, 5.9 Hz, 3H), 1.28 – 1.19 (m, 1H), 1.12 (s, 3H) ppm. (<b>Fig. S25</b>)<br/> <b><sup>13</sup>C NMR</b> (100.6 MHz, CDCl<sub>3</sub>) δ 189.07, 165.25, 164.20, 153.72, 144.56, 142.85, 142.34, 137.61, 137.41, 134.14, 132.56, 131.44, 129.90, 129.75, 129.52, 128.98, 128.94, 128.83, 127.98, 127.22, 126.16, 125.61, 125.52, 123.93, 122.27, 111.78, 76.24, 74.65, 70.13, 47.66, 32.27, 28.31, 15.58, 14.55 ppm. (<b>Fig. S26</b>)<br/> <b>DEPT-135</b> (100.6 MHz, CDCl<sub>3</sub>) δ 131.4, 129.9, 129.8, 129.5, 129.0, 128.9, 128.8, 128.0, 127.2, 126.2, 125.6, 125.5, 123.9, 122.3, 111.8, 70.1, 47.7, 32.3, 28.3, 15.6, 14.5 ppm. (<b>Fig. S27</b>)<br/> <b>FT-IR (KBr) u<sub>max</sub></b> = 1646.77 (C=O), 1478.13 (C=C) cm<sup>-1</sup>. (<b>Fig. S28</b>)<br/> <b>HRMS (ESI):</b> Calcd for C<sub>36</sub>H<sub>31</sub>N<sub>3</sub>OS<sub>2</sub> (M+H)<sup>+</sup> m/z = 585.1909; Found 586.1808. (<b>Fig. S29</b>)</p> |

|                                                                                                                                  |                                                                                                                                                                                                                                                                                                                                                                                                                                                                                                                                                                                                                                                                                                                                                                                                                                                                                                                                                                                                                                                                                                                                                                                                                                                                                                                                                                                                                                                                                                                                                                                                                                                                                                                                        |
|----------------------------------------------------------------------------------------------------------------------------------|----------------------------------------------------------------------------------------------------------------------------------------------------------------------------------------------------------------------------------------------------------------------------------------------------------------------------------------------------------------------------------------------------------------------------------------------------------------------------------------------------------------------------------------------------------------------------------------------------------------------------------------------------------------------------------------------------------------------------------------------------------------------------------------------------------------------------------------------------------------------------------------------------------------------------------------------------------------------------------------------------------------------------------------------------------------------------------------------------------------------------------------------------------------------------------------------------------------------------------------------------------------------------------------------------------------------------------------------------------------------------------------------------------------------------------------------------------------------------------------------------------------------------------------------------------------------------------------------------------------------------------------------------------------------------------------------------------------------------------------|
| 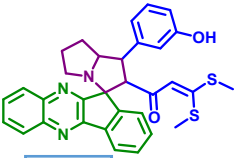 <p style="text-align: center;"><b>6g</b></p>   | <p><b>Nature:</b> Bright yellow solid<br/> <b>Yield:</b> 85%<br/> <b>R<sub>f</sub></b> (25% EtOAc-Hexane): 0.35<br/> <b>Mp:</b> 270-271 °C<br/> <b><sup>1</sup>H NMR</b> (400 MHz, CDCl<sub>3</sub>) δ 8.14 – 8.02 (m, 2H), 8.02 – 7.95 (m, 1H), 7.73 – 7.65 (m, 2H), 7.61 (td, <i>J</i> = 7.7, 1.5 Hz, 1H), 7.54 (td, <i>J</i> = 7.5, 1.3 Hz, 1H), 7.51 – 7.46 (m, 1H), 7.30 (s, 1H), 7.16 (t, <i>J</i> = 7.7 Hz, 1H), 7.10 (d, <i>J</i> = 7.7 Hz, 1H), 6.73 – 6.66 (m, 1H), 4.79 (d, <i>J</i> = 12.1 Hz, 1H), 4.72 (s, 1H), 4.38 – 4.22 (m, 1H), 4.04 (dd, <i>J</i> = 12.0, 9.5 Hz, 1H), 2.63 – 2.45 (m, 2H), 2.07 (s, 3H), 2.06 – 1.79 (m, 4H), 1.15 (s, 3H) ppm. (<b>Fig. S30</b>)<br/> <b><sup>13</sup>C NMR</b> (100.6 MHz, CDCl<sub>3</sub>) δ 188.6, 164.8, 164.8, 156.7, 153.6, 144.0, 142.6, 141.9, 141.9, 137.4, 131.2, 129.7, 129.6, 129.5, 129.5, 129.0, 128.7, 127.8, 122.3, 120.5, 115.0, 114.3, 111.6, 76.0, 73.0, 69.2, 52.0, 47.8, 31.6, 28.2, 15.7, 14.6 ppm. (<b>Fig. S31</b>)<br/> <b>DEPT-135</b> (100.6 MHz, CDCl<sub>3</sub>) δ 131.3, 129.7, 129.7, 129.6, 129.5, 129.1, 128.7, 127.9, 122.3, 120.6, 115.1, 114.4, 111.6, 73.0, 69.3, 52.0, 47.9, 31.7, 28.2, 15.7, 14.6 ppm. (<b>Fig. S32</b>)<br/> <b>FT-IR (KBr) u<sub>max</sub></b> = 3296.88 (-OH), 1597.47 (C=O), 1485.91 (C=C) cm<sup>-1</sup>. (<b>Fig. S33</b>)<br/> <b>SC-XRD: CCDC</b> (<b>Fig. S67</b>), <b><sup>13</sup>C-<sup>1</sup>H</b> (<b>Fig. S35</b>), <b><sup>1</sup>H-<sup>1</sup>H COSY</b> (<b>Fig. S36</b>), and <b>HMBC</b> (<b>Fig. S37</b>)<br/> <b>HRMS (ESI):</b> Calcd for C<sub>32</sub>H<sub>29</sub>N<sub>3</sub>O<sub>2</sub>S<sub>2</sub> (M+H)<sup>+</sup> <i>m/z</i> = 551.1701; Found 552.1733. (<b>Fig. S34</b>)</p> |
|  <p style="text-align: center;"><b>6h</b></p> | <p><b>Nature:</b> Dark yellow solid<br/> <b>Yield:</b> 84%<br/> <b>R<sub>f</sub></b> (15% EtOAc-Hexane): 0.30<br/> <b>Mp:</b> 280-283 °C<br/> <b><sup>1</sup>H NMR</b> (400 MHz, CDCl<sub>3</sub>) δ 8.37 – 8.27 (m, 1H), 8.15 – 8.11 (m, 2H), 7.77 – 7.73 (m, 2H), 7.71 – 7.65 (m, 1H), 7.55 (td, <i>J</i> = 7.5, 1.3 Hz, 1H), 7.51 (dd, <i>J</i> = 7.4, 0.9 Hz, 1H), 7.49 – 7.44 (m, 4H), 4.63 (d, <i>J</i> = 11.8 Hz, 1H), 4.58 (s, 1H), 4.33 (dt, <i>J</i> = 9.1, 7.1 Hz, 1H), 4.05 (dd, <i>J</i> = 11.8, 9.4 Hz, 1H), 2.72 – 2.55 (m, 1H), 2.53 – 2.49 (m, 1H), 2.11 (s, 3H), 2.05 – 1.86 (m, 3H), 1.79 (dq, <i>J</i> = 11.8, 7.7 Hz, 1H), 1.13 (s, 3H) ppm. (<b>Fig. S38</b>)<br/> <b><sup>13</sup>C NMR</b> (100.6 MHz, CDCl<sub>3</sub>) δ 188.4, 164.9, 164.6, 153.6, 144.1, 142.8, 142.25, 139.8, 137.4, 131.6, 131.3, 130.6, 130.2, 130.0, 129.8, 129.5, 129.0, 128.9, 127.8, 122.2, 120.5, 111.4, 75.8, 72.8, 69.6, 51.2, 47.7, 31.6, 28.1, 15.5, 14.6 ppm. (<b>Fig. S39</b>)<br/> <b>DEPT-135</b> (100.6 MHz, CDCl<sub>3</sub>) δ 131.7, 131.3, 131.1, 130.6, 130.3, 130.1, 129.8, 129.6, 129.0, 128.9, 127.9, 122.2, 113.5, 111.5, 72.9, 69.6, 51.3, 47.7, 31.6, 28.2, 15.6, 14.6 ppm. (<b>Fig. S40</b>)<br/> <b>FT-IR (KBr) u<sub>max</sub></b> = 1641.58 (C=O), 1488.51 (C=C), 756.85 (-Br) cm<sup>-1</sup>. (<b>Fig. S41</b>)<br/> <b>HRMS (ESI):</b> Calcd for C<sub>32</sub>H<sub>28</sub>BrN<sub>3</sub>OS<sub>2</sub> (M+H)<sup>+</sup> <i>m/z</i> = 613.0857; Found 614.0939. (<b>Fig. S42</b>)</p>                                                                                                                                                                                                              |
|  <p style="text-align: center;"><b>6i</b></p> | <p><b>Nature:</b> Sandal yellow solid<br/> <b>Yield:</b> 76%<br/> <b>R<sub>f</sub></b> (30% EtOAc-Hexane): 0.38<br/> <b>Mp:</b> 269-270 °C<br/> <b><sup>1</sup>H NMR</b> (400 MHz, CDCl<sub>3</sub>) δ 8.34 – 8.31 (m, 1H), 8.13 – 8.12 (m, 1H), 7.76 – 7.72 (m, 3H), 7.69 (s, 1H), 7.55 (dd, <i>J</i> = 5.3, 2.2 Hz, 2H), 7.49 (d, <i>J</i> = 1.0 Hz, 1H), 6.82 (ddd, <i>J</i> = 10.2, 8.3, 4.6 Hz, 3H), 4.82 (s, 1H), 4.64 (s, 1H), 4.33 (d, <i>J</i> = 9.5 Hz, 1H), 4.27 – 4.23 (m, 1H), 2.53 – 2.49 (m, 2H), 2.09 (s, 3H), 1.91 (d, <i>J</i> = 5.0 Hz, 2H), 1.15 (s, 3H) ppm. (<b>Fig. S43</b>)<br/> <b><sup>13</sup>C NMR</b> (100.6 MHz, CDCl<sub>3</sub>) δ 188.36, 164.90, 164.70, 153.73, 144.11, 142.86, 142.30, 137.48, 131.44, 129.88, 129.82, 129.73, 129.61, 129.01, 128.93, 127.79, 122.23, 111.53, 111.29, 111.21, 104.36, 104.11, 103.84, 75.67, 72.00, 67.59, 47.65, 44.49, 31.65, 28.19, 15.58, 14.59 ppm. (<b>Fig. S44</b>)<br/> <b>DEPT-135</b> (100.6 MHz, CDCl<sub>3</sub>) δ 131.4, 129.9, 129.8, 129.7, 129.6, 129.0, 128.9, 127.8, 122.2, 111.5, 111.3, 111.2, 104.4, 104.1, 103.8, 72.0, 67.6, 47.6, 44.5, 31.7, 28.2, 15.6, 14.6 ppm. (<b>Fig. S45</b>)<br/> <b>HRMS (ESI):</b> Calcd for C<sub>32</sub>H<sub>27</sub>F<sub>2</sub>N<sub>3</sub>OS<sub>2</sub> (M+H)<sup>+</sup> <i>m/z</i> = 571.1564; Found 572.1599. (<b>Fig. S46</b>)</p>                                                                                                                                                                                                                                                                                                                                                              |

|                                                                                                                                |                                                                                                                                                                                                                                                                                                                                                                                                                                                                                                                                                                                                                                                                                                                                                                                                                                                                                                                                                                                                                                                                                                                                                                                                                                                                                                                                                                                                                                                                                                                          |
|--------------------------------------------------------------------------------------------------------------------------------|--------------------------------------------------------------------------------------------------------------------------------------------------------------------------------------------------------------------------------------------------------------------------------------------------------------------------------------------------------------------------------------------------------------------------------------------------------------------------------------------------------------------------------------------------------------------------------------------------------------------------------------------------------------------------------------------------------------------------------------------------------------------------------------------------------------------------------------------------------------------------------------------------------------------------------------------------------------------------------------------------------------------------------------------------------------------------------------------------------------------------------------------------------------------------------------------------------------------------------------------------------------------------------------------------------------------------------------------------------------------------------------------------------------------------------------------------------------------------------------------------------------------------|
| 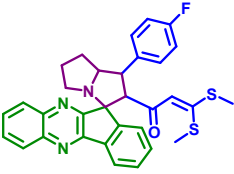 <p style="text-align: center;"><b>6j</b></p> | <p><b>Nature:</b> Mild brown solid<br/> <b>Yield:</b> 78%<br/> <b>R<sub>f</sub></b> (30% EtOAc-Hexane): 0.40<br/> <b>Mp:</b> 276-278 °C<br/> <b><sup>1</sup>H NMR</b> (400 MHz, CDCl<sub>3</sub>) δ 8.35 – 8.28 (m, 1H), 8.13 (d, <i>J</i> = 7.1 Hz, 2H), 7.78 – 7.72 (m, 2H), 7.69 (d, <i>J</i> = 7.6 Hz, 1H), 7.58 – 7.52 (m, 3H), 7.52 – 7.47 (m, 1H), 7.02 (t, <i>J</i> = 8.7 Hz, 2H), 4.63 (d, <i>J</i> = 11.8 Hz, 1H), 4.59 (s, 1H), 4.39 – 4.29 (m, 1H), 4.07 (dd, <i>J</i> = 11.8, 9.4 Hz, 1H), 2.61 – 2.45 (m, 3H), 2.11 (s, 3H), 2.01 – 1.87 (m, 3H), 1.79 (dd, <i>J</i> = 8.3, 3.7 Hz, 1H), 1.13 (s, 3H). (<b>Fig. S47</b>)<br/> <b><sup>13</sup>C NMR</b> (100.6 MHz, CDCl<sub>3</sub>) δ 188.65, 165.08, 164.46, 153.69, 144.20, 142.83, 142.27, 137.40, 136.47, 136.44, 131.30, 129.83, 129.80, 129.73, 129.66, 129.55, 129.00, 128.92, 127.93, 122.18, 115.48, 115.27, 111.63, 75.88, 73.03, 69.83, 51.02, 47.74, 31.65, 28.19, 15.57, 14.61 ppm. (<b>Fig. S48</b>)<br/> <b>DEPT-135</b> (100.6 MHz, CDCl<sub>3</sub>) δ 131.3, 129.8, 129.8, 129.7, 129.7, 129.6, 129.0, 128.9, 127.9, 122.2, 115.5, 115.3, 111.6, 73.0, 69.8, 51.0, 47.7, 31.6, 28.2, 15.6, 14.6 ppm. (<b>Fig. S49</b>)<br/> <b>FT-IR (KBr) u<sub>max</sub></b> = 1643.58 (C=O), 1494.14 (C=C), 756.25 (-F) cm<sup>-1</sup>. (<b>Fig. S50</b>)<br/> <b>HRMS (ESI):</b> Calcd for C<sub>32</sub>H<sub>28</sub>FN<sub>3</sub>OS<sub>2</sub> (M+H)<sup>+</sup> <i>m/z</i> = 553.7144; Found 554.1945. (<b>Fig. S51</b>)</p>                |
|  <p style="text-align: center;"><b>6k</b></p> | <p><b>Nature:</b> Brown solid<br/> <b>Yield:</b> 80%<br/> <b>R<sub>f</sub></b> (30% EtOAc-Hexane): 0.35<br/> <b>Mp:</b> 260-270 °C<br/> <b><sup>1</sup>H NMR</b> (400 MHz, CDCl<sub>3</sub>) δ 8.38 – 8.29 (m, 1H), 8.13 (d, <i>J</i> = 7.2 Hz, 1H), 8.06 – 7.98 (m, 1H), 7.85 – 7.70 (m, 3H), 7.60 (d, <i>J</i> = 15.9 Hz, 1H), 7.50 (dd, <i>J</i> = 8.3, 2.5 Hz, 2H), 7.23 (d, <i>J</i> = 8.2 Hz, 1H), 7.19 (d, <i>J</i> = 8.1 Hz, 1H), 6.79 (d, <i>J</i> = 15.8 Hz, 1H), 2.91 (ddd, <i>J</i> = 20.7, 13.8, 7.3 Hz, 1H), 2.51 (d, <i>J</i> = 3.3 Hz, 3H), 2.25 – 2.04 (m, 3H), 1.98 – 1.74 (m, 4H), 1.22 (s, 3H), 1.13 (s, 2H). ppm. (<b>Fig. S52</b>)<br/> <b><sup>13</sup>C NMR</b> (100.6 MHz, CDCl<sub>3</sub>) δ 189.0, 165.1, 153.7, 151.2, 147.1, 144.4, 142.8, 141.3, 138.1, 137.4, 128.9, 128.3, 128.2, 128.0, 127.0, 126.6, 126.4, 122.1, 121.4, 113.4, 111.9, 76.1, 73.1, 69.9, 61.1, 51.4, 47.8, 34.1, 33.7, 23.8, 17.3, 15.1 ppm. (<b>Fig. S53</b>)<br/> <b>DEPT-135</b> (100.6 MHz, CDCl<sub>3</sub>) δ 141.3, 128.9, 128.3, 128.2, 128.0, 127.0, 126.6, 126.4, 122.1, 121.4, 113.4, 111.9, 73.1, 69.9, 51.4, 47.8, 34.1, 33.7, 31.8, 28.2, 23.8, 17.3, 15.1, 14.6 ppm. (<b>Fig. S54</b>)<br/> <b>FT-IR (KBr) u<sub>max</sub></b> = 1587.54 (C=O), 1475.46 (C=C), 1123.20 (=C-H) cm<sup>-1</sup>. (<b>Fig. S55</b>)<br/> <b>HRMS (ESI):</b> Calcd for C<sub>34</sub>H<sub>33</sub>N<sub>3</sub>O<sub>2</sub>S<sub>2</sub> (M+H)<sup>+</sup> <i>m/z</i> = 579.2014; Found 580.2083. (<b>Fig. S56</b>)</p> |



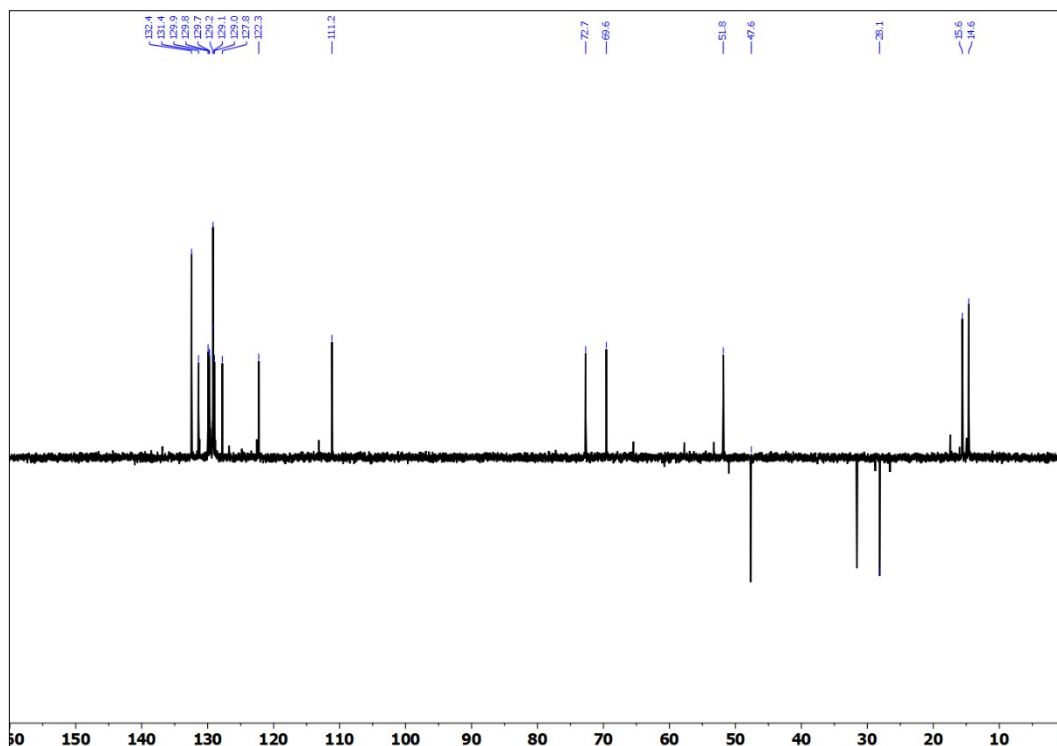

Fig S3: DEPT-135 NMR Spectrum of compound 6a

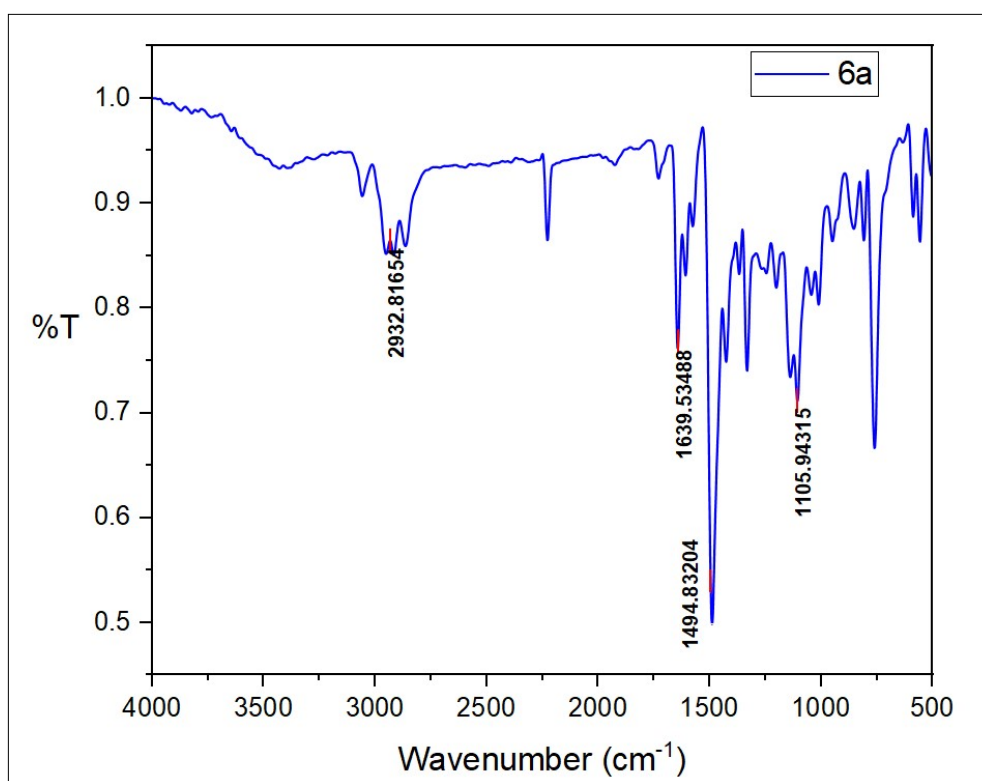

Fig S4: FT-IR Spectrum of compound 6a

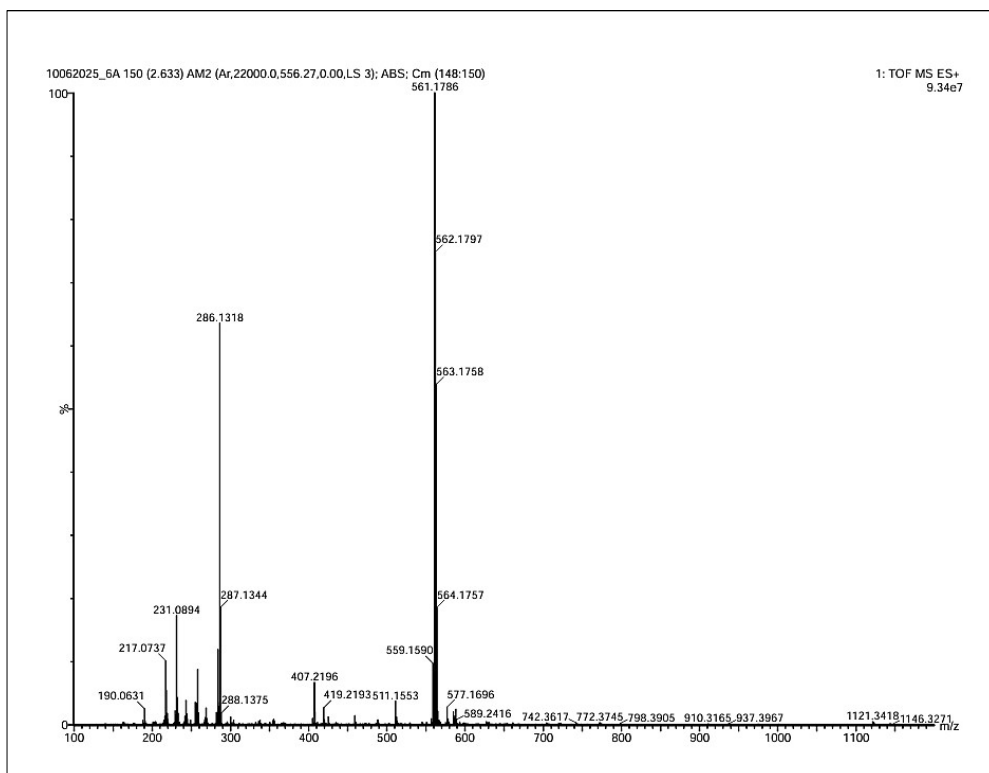

Fig S5: HRMS Spectrum of compound 6a

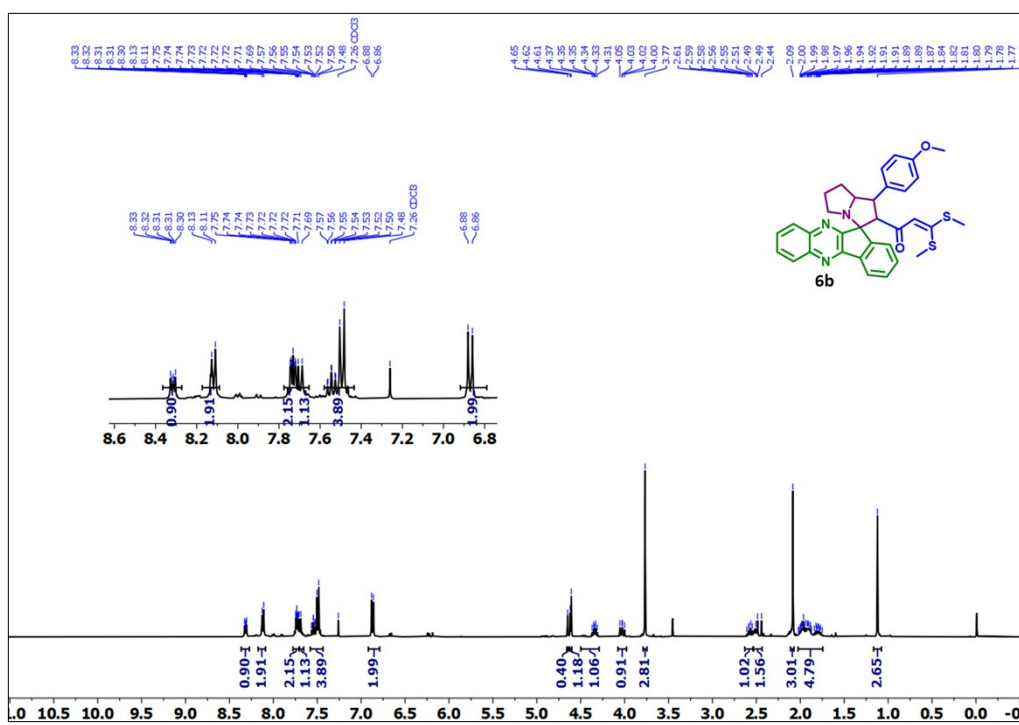

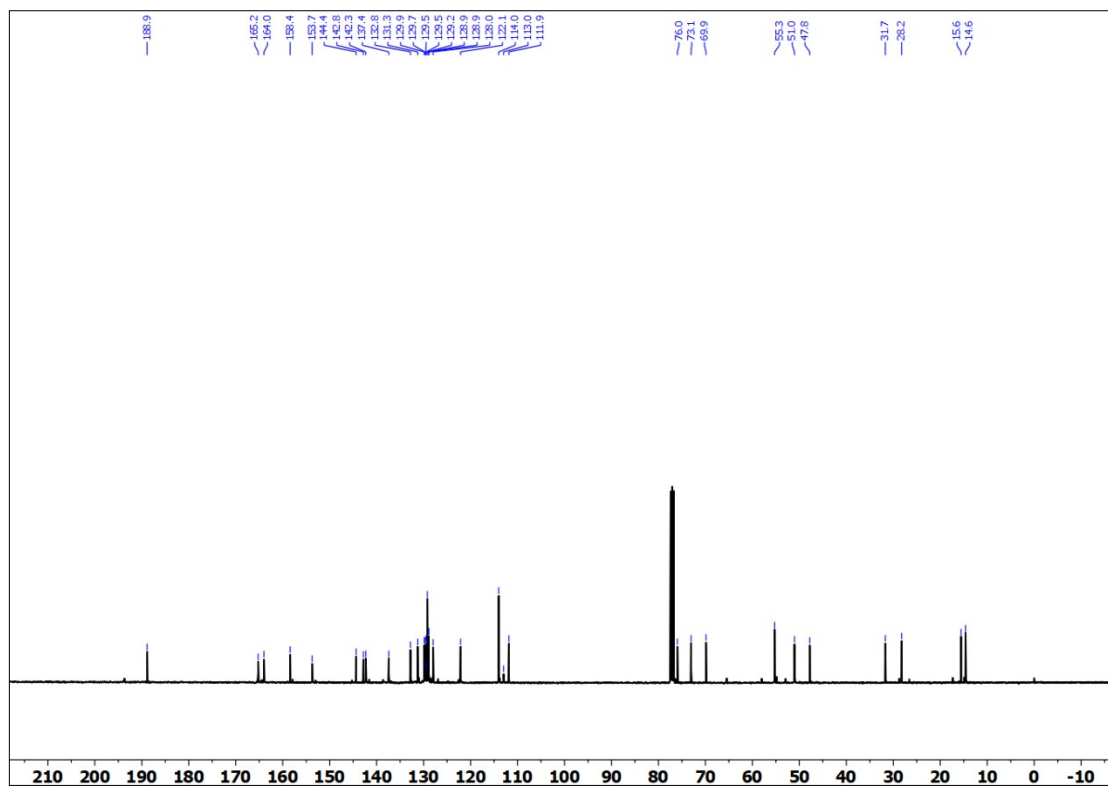

Fig S7: <sup>13</sup>C NMR Spectrum of compound **6b**

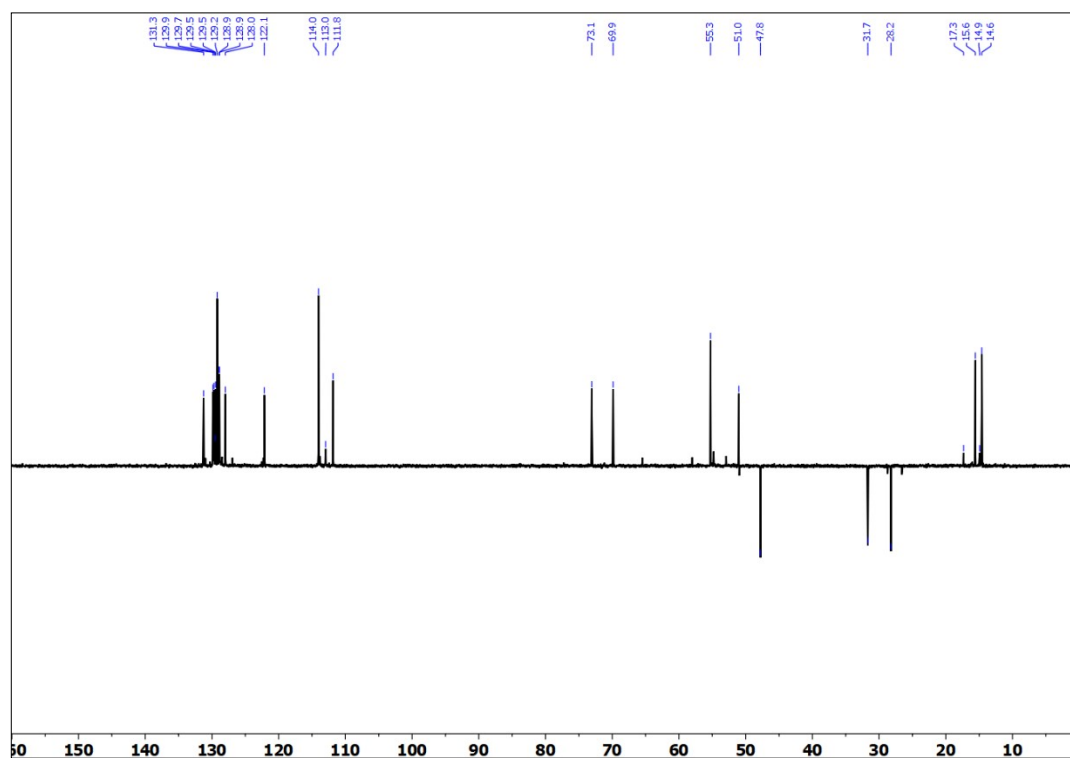

Fig S8: DEPT-135 NMR Spectrum of compound **6b**

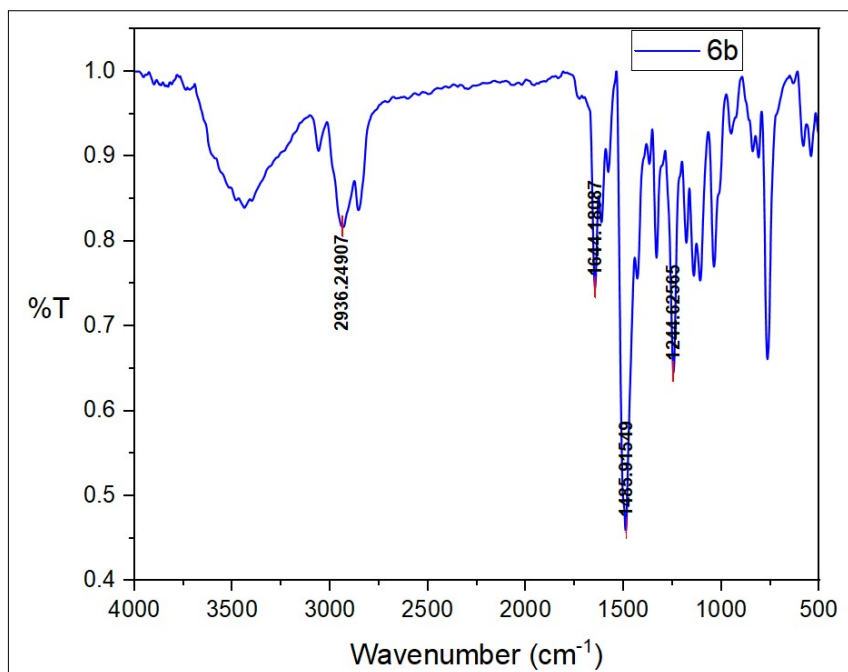

Fig S9: FT-IR Spectrum of compound 6b

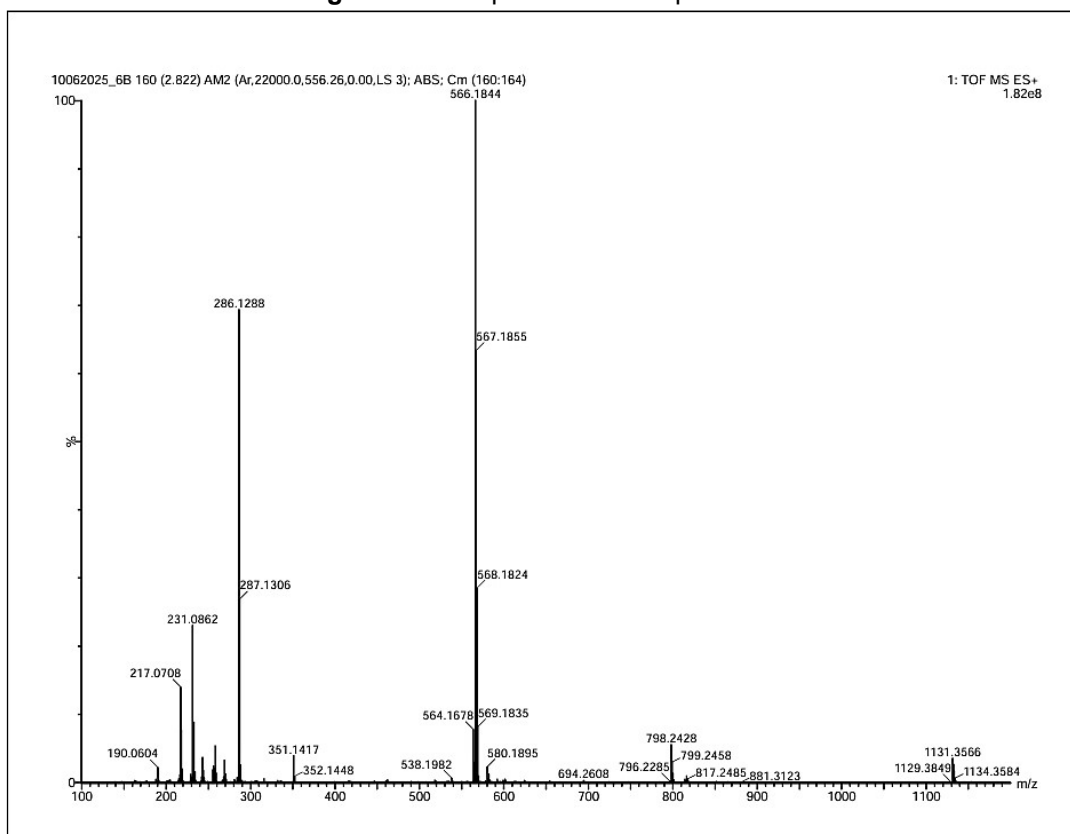

Fig S10: HRMS Spectrum of compound 6b

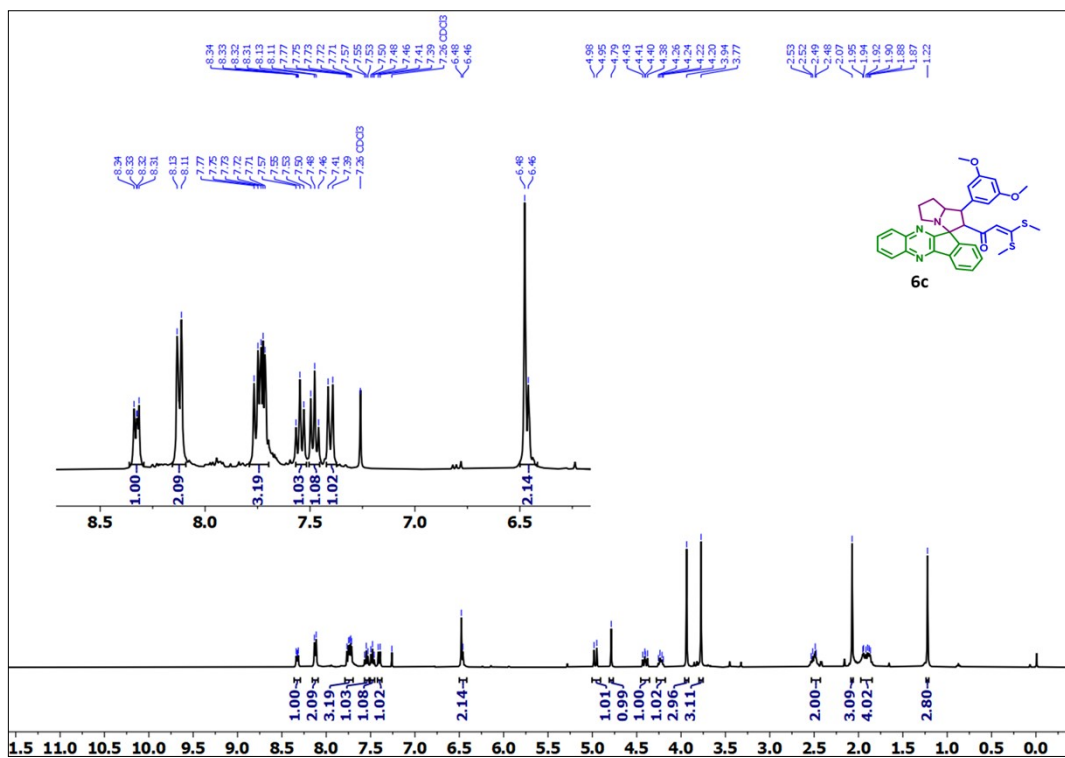**Fig S11: <sup>1</sup>H NMR Spectrum of compound 6c**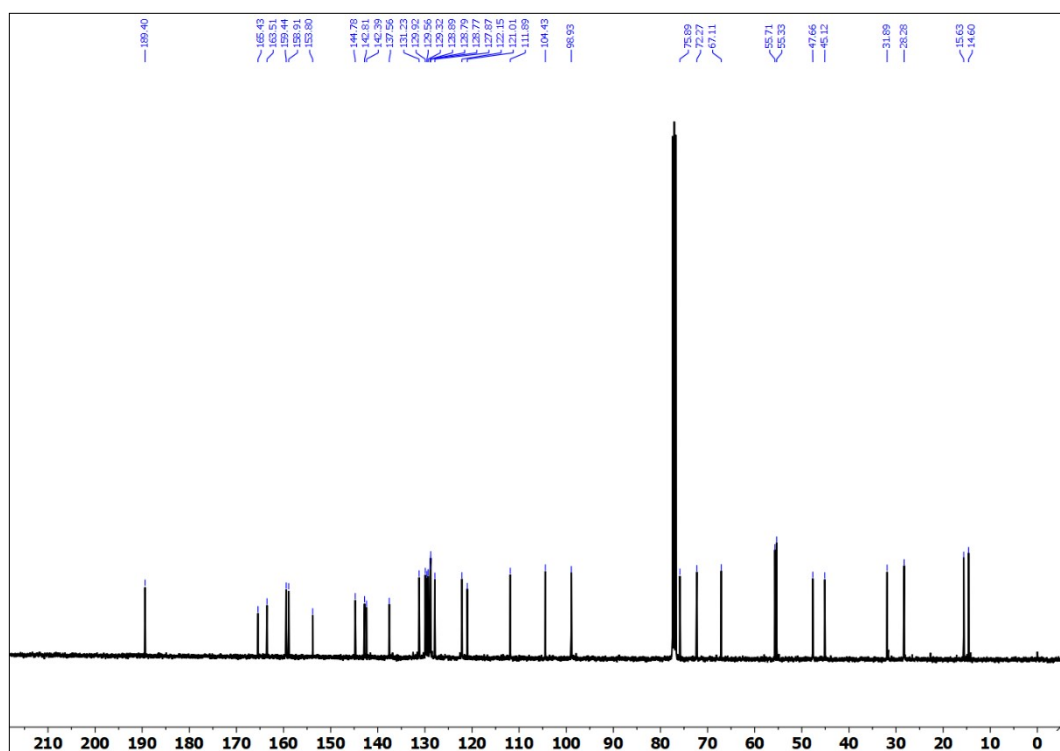**Fig S12: <sup>13</sup>C NMR Spectrum of compound 6c**

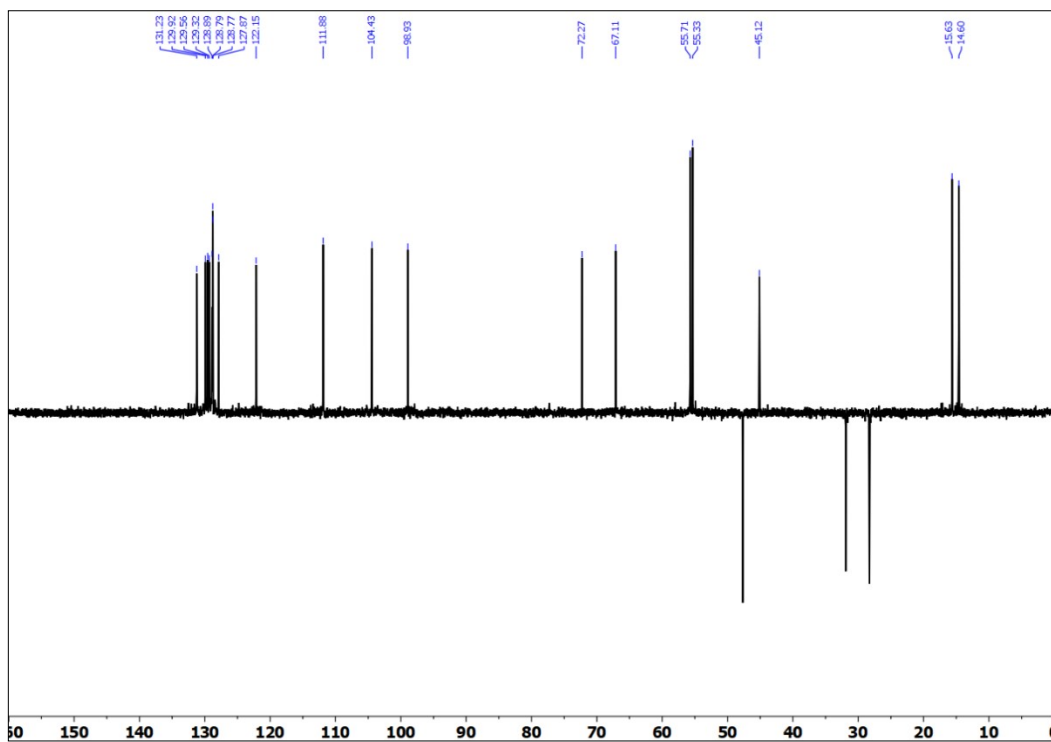

Fig S13: DEPT-135 NMR Spectrum of compound 6c

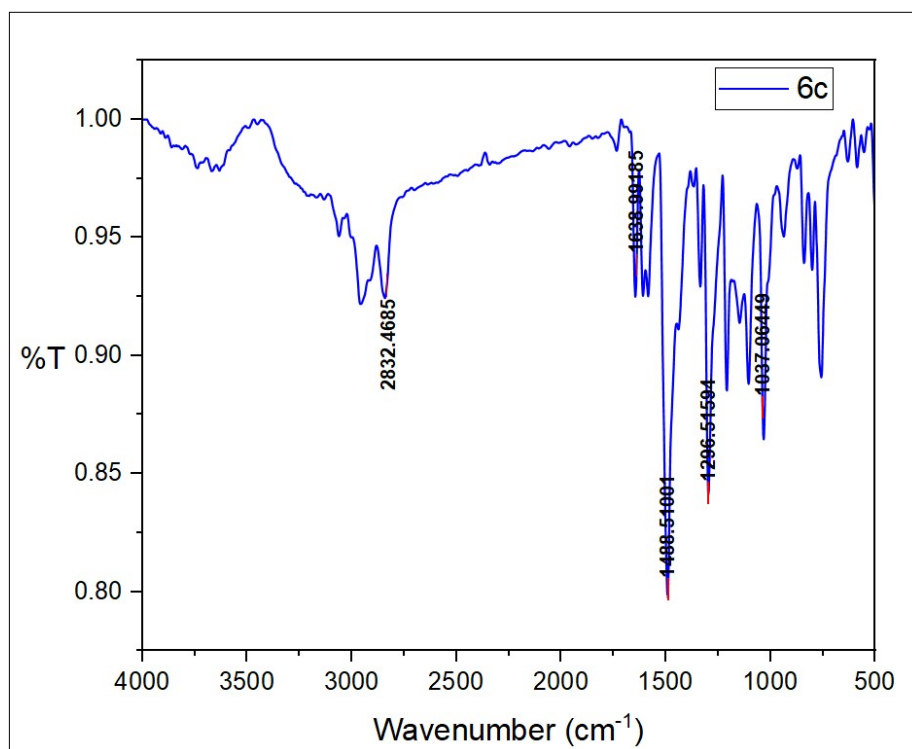

Fig S14: FT-IR Spectrum of compound 6c

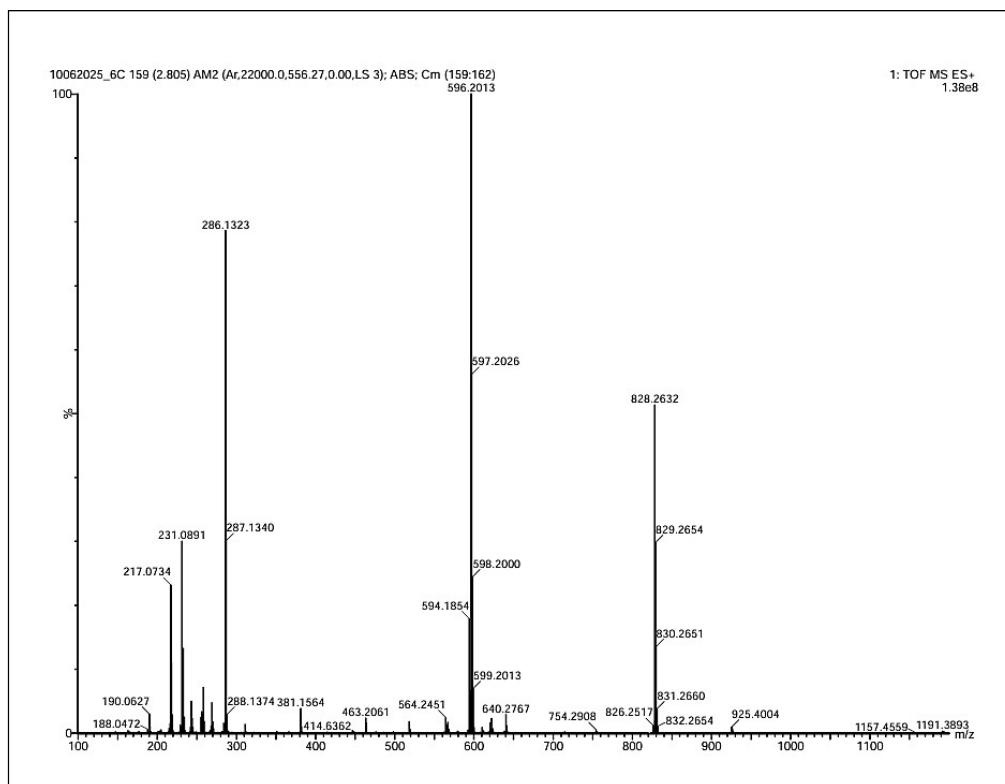

Fig S15: HRMS Spectrum of compound 6c

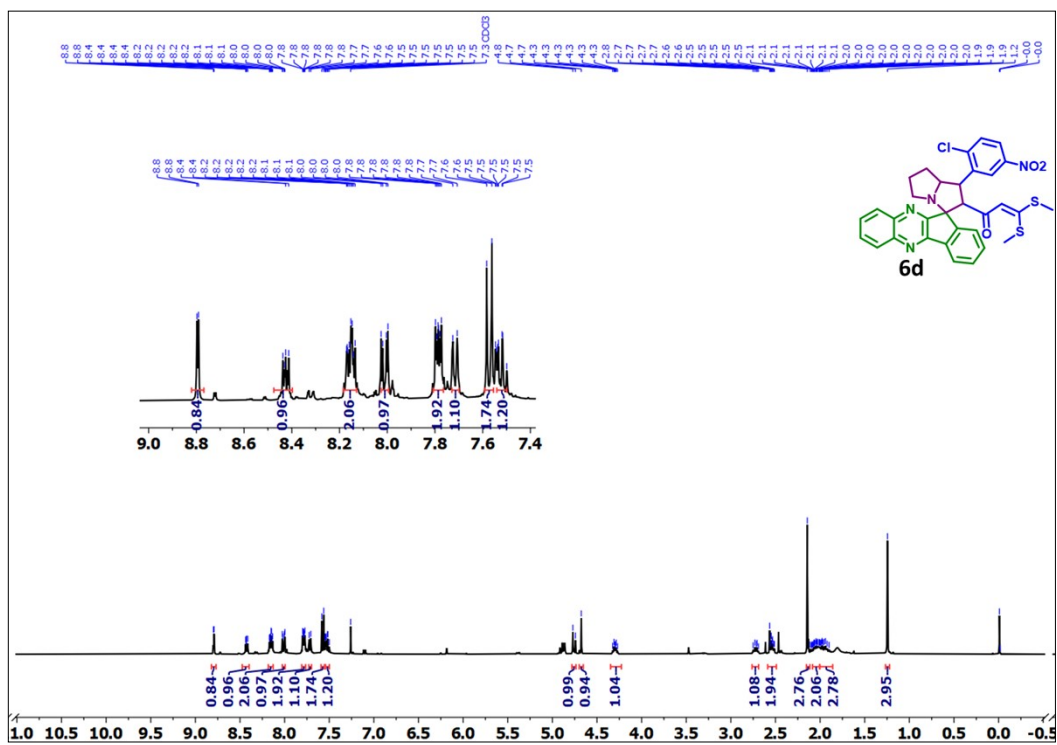Fig S16: <sup>1</sup>H NMR Spectrum of compound 6d

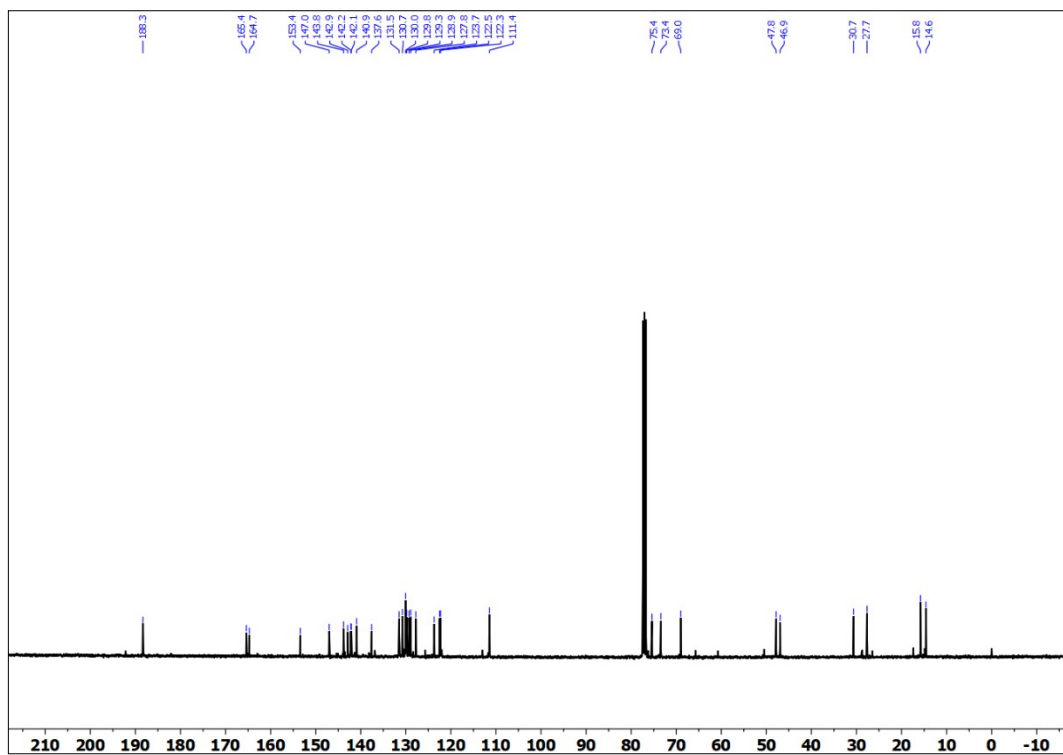Fig S17:  $^{13}\text{C}$  NMR Spectrum of compound 6d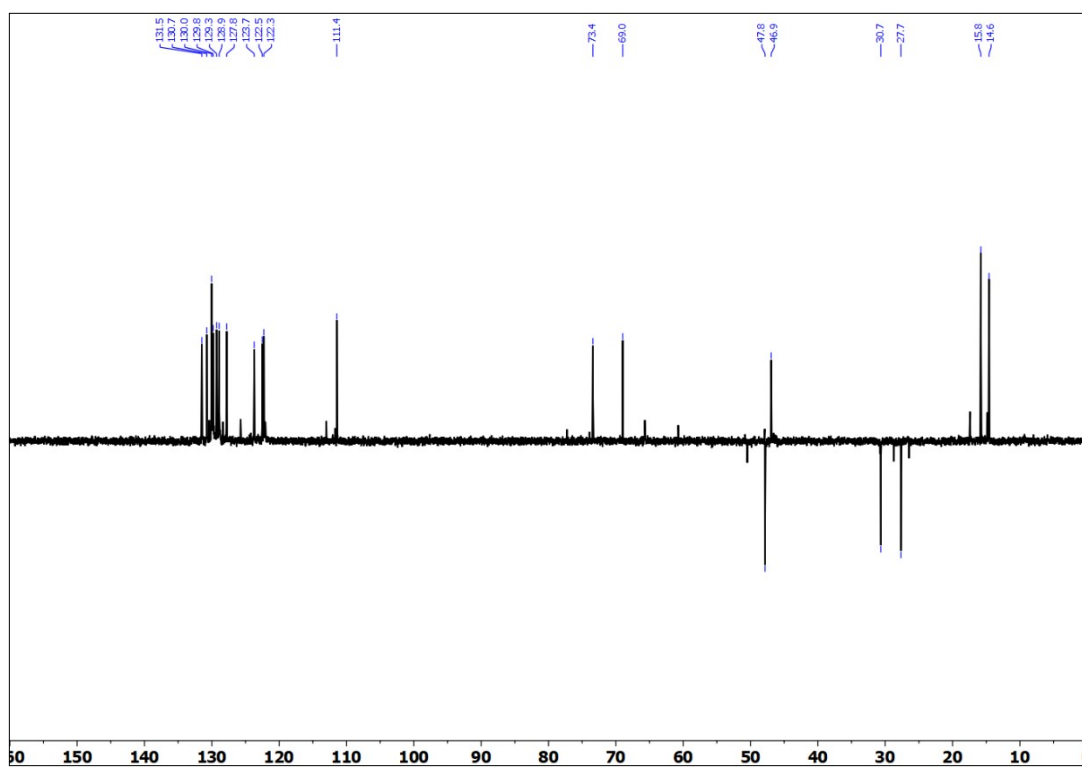

Fig S18: DEPT-135 NMR Spectrum of compound 6d

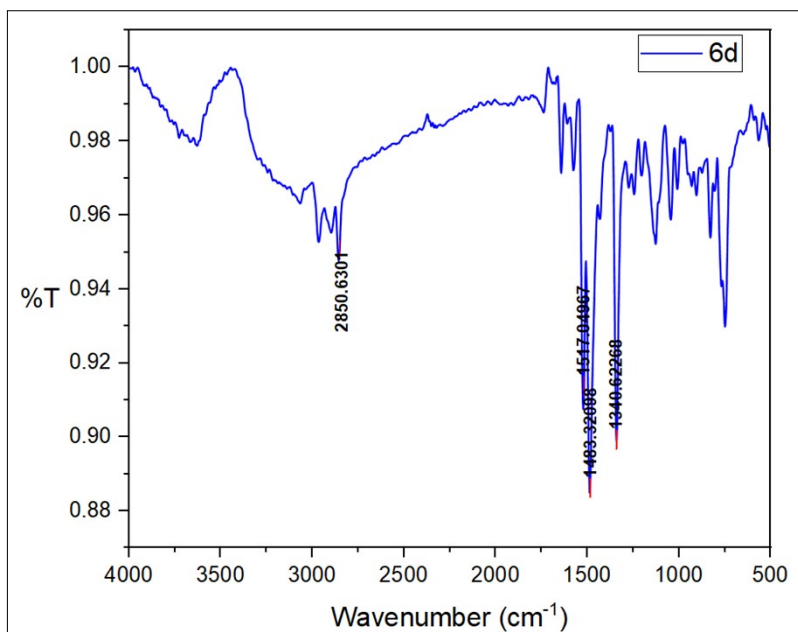**Fig S19: FT-IR Spectrum of compound 6d**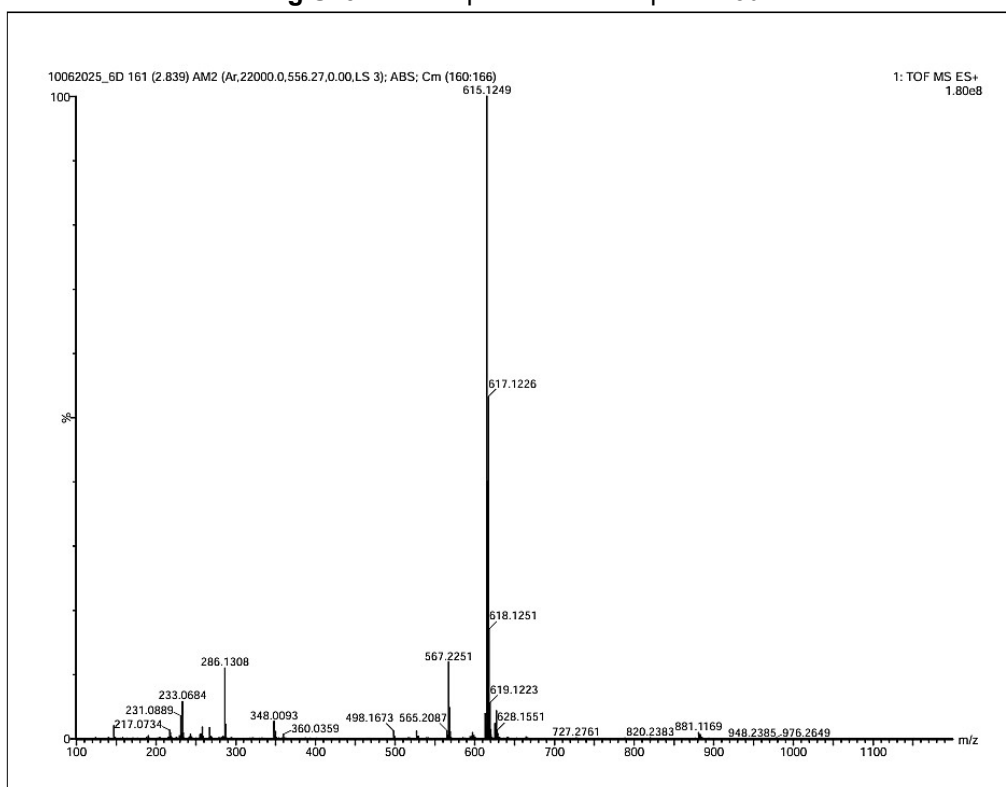**Fig S20: HRMS Spectrum of compound 6d**



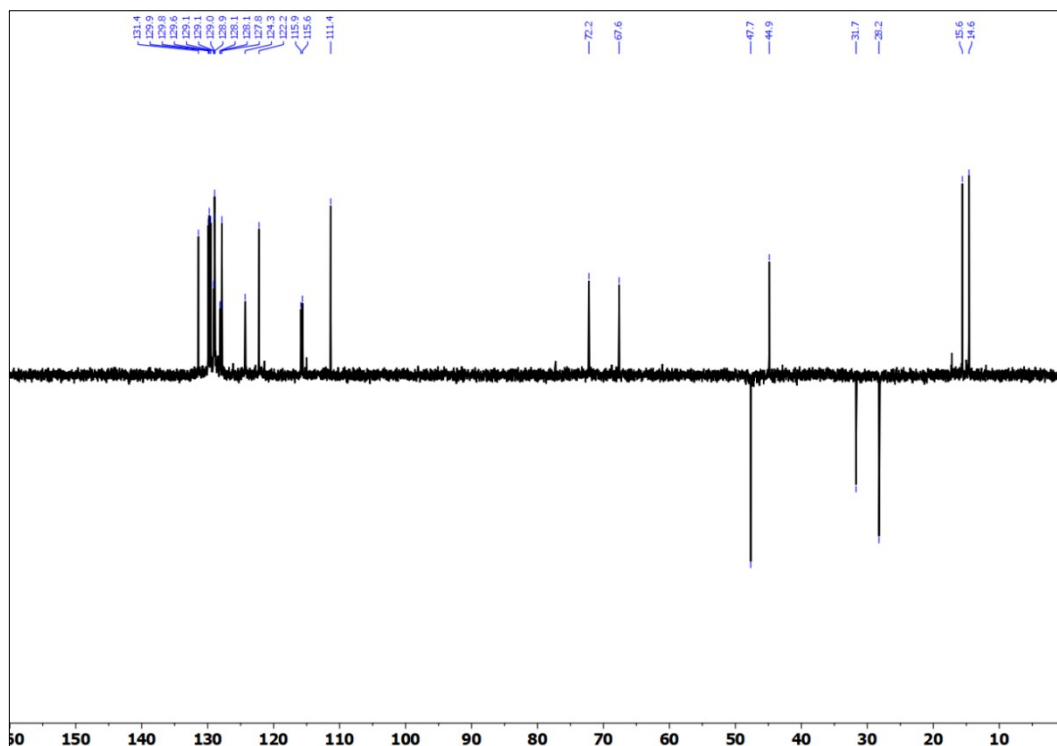

Fig S23: DEPT-135 NMR Spectrum of compound 6e

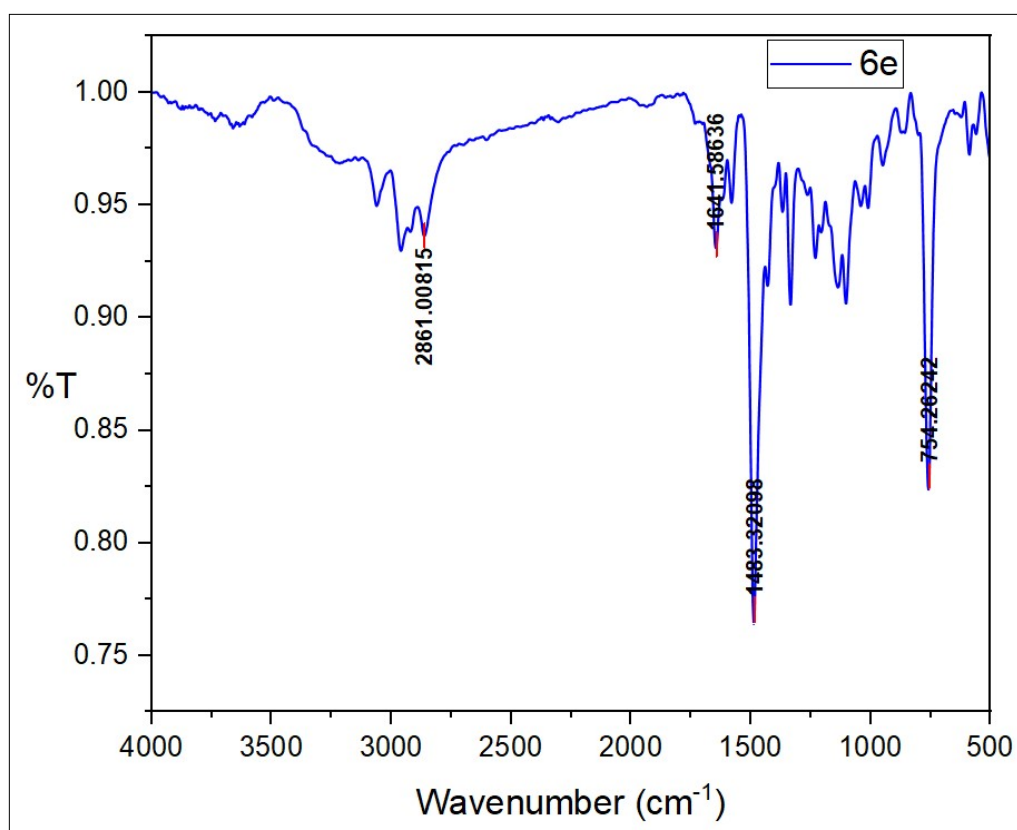

Fig S24: FT-IR Spectrum of compound 6e

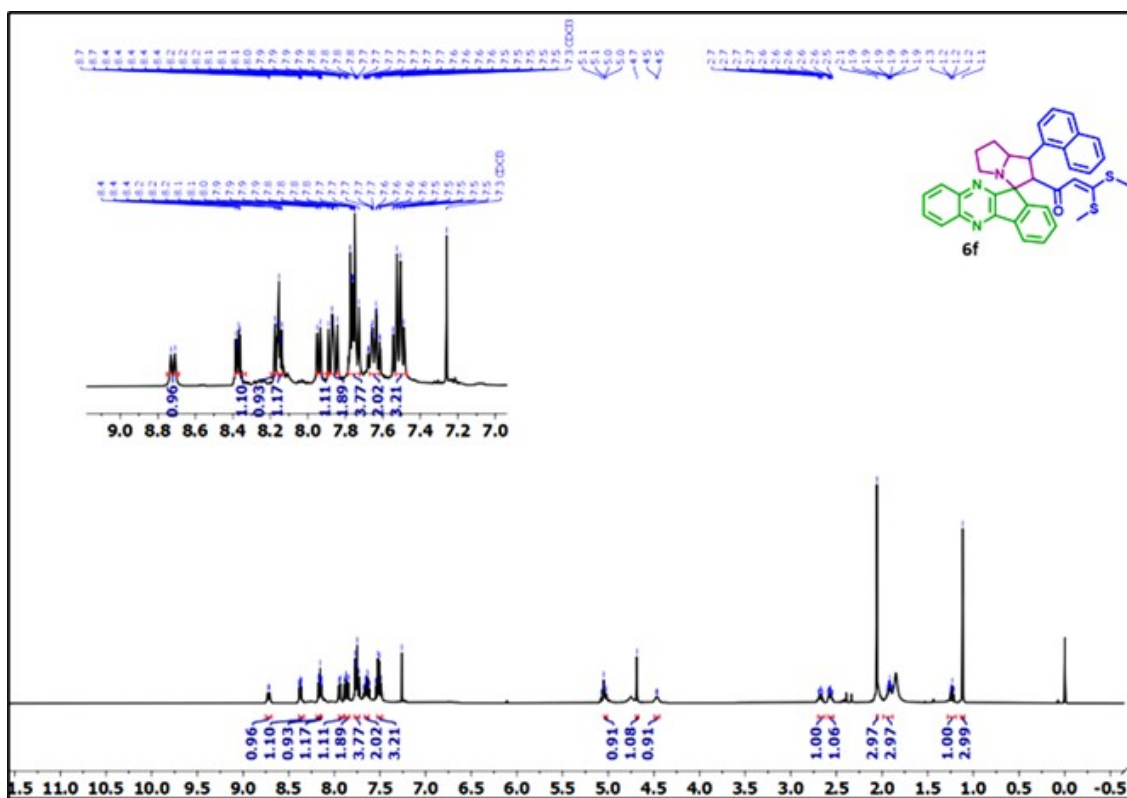Fig S25: <sup>1</sup>H NMR Spectrum of compound **6f**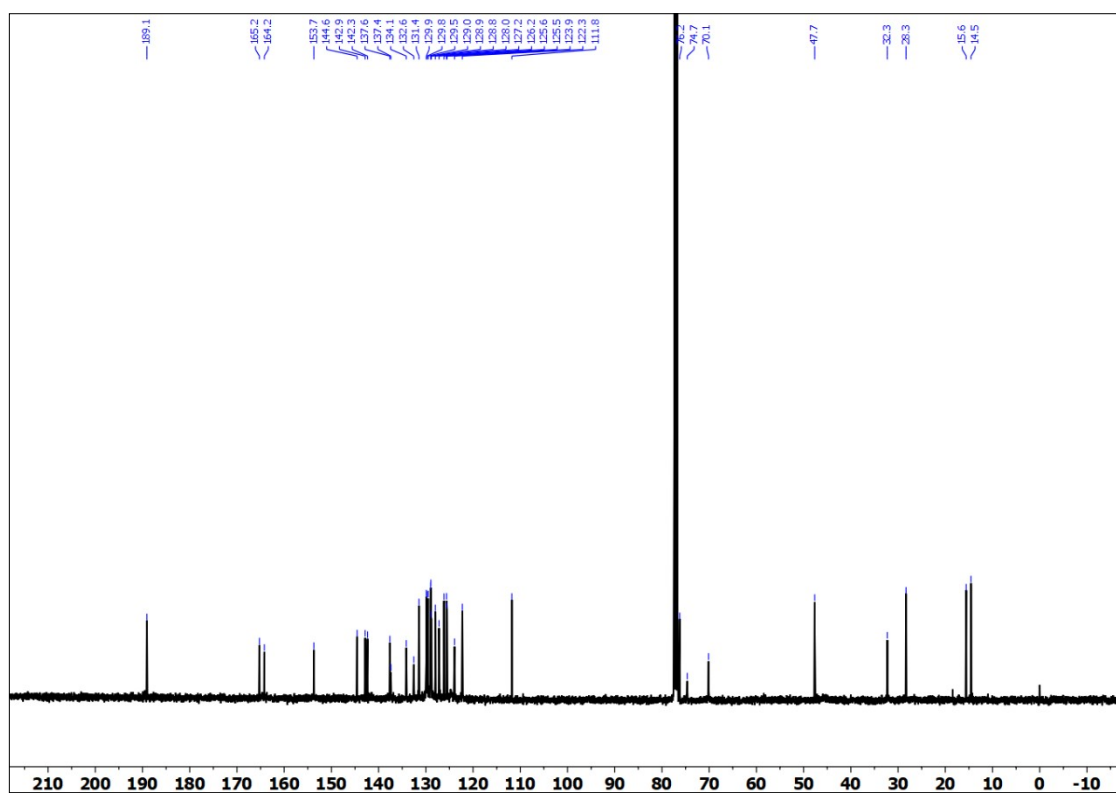Fig S26: <sup>13</sup>C NMR Spectrum of compound **6f**

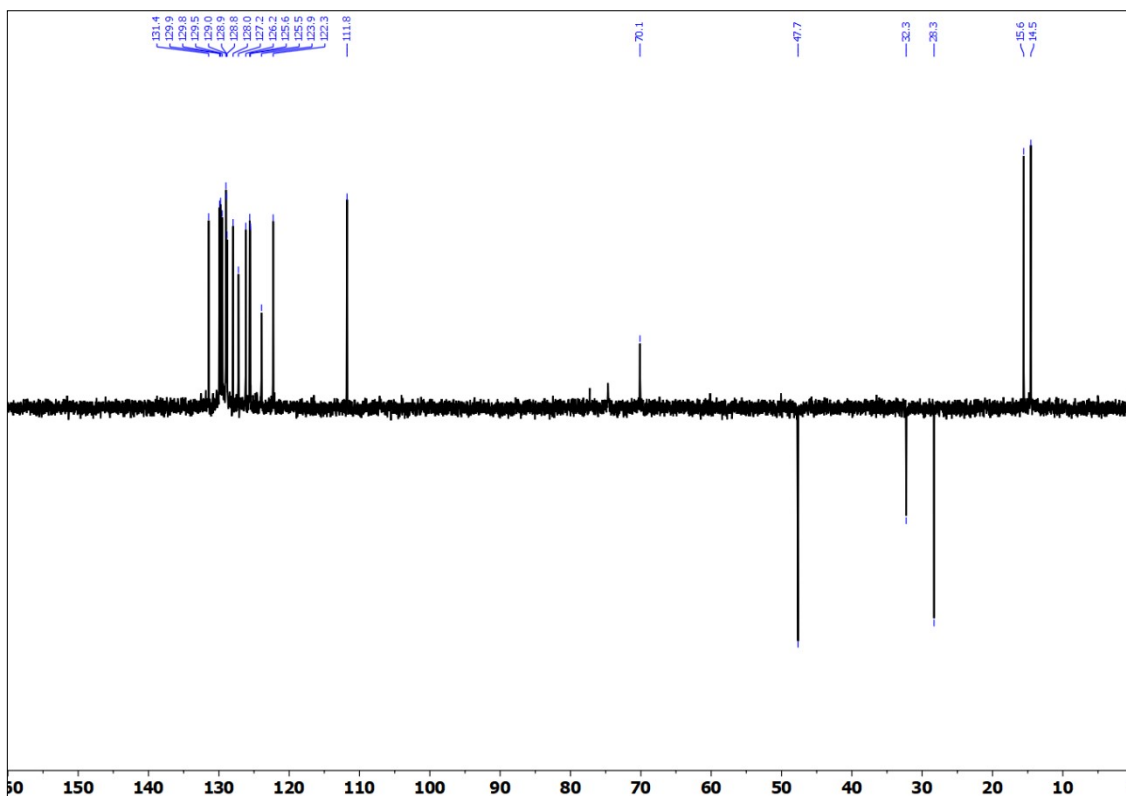

Fig S27: DEPT-135 NMR Spectrum of compound 6f

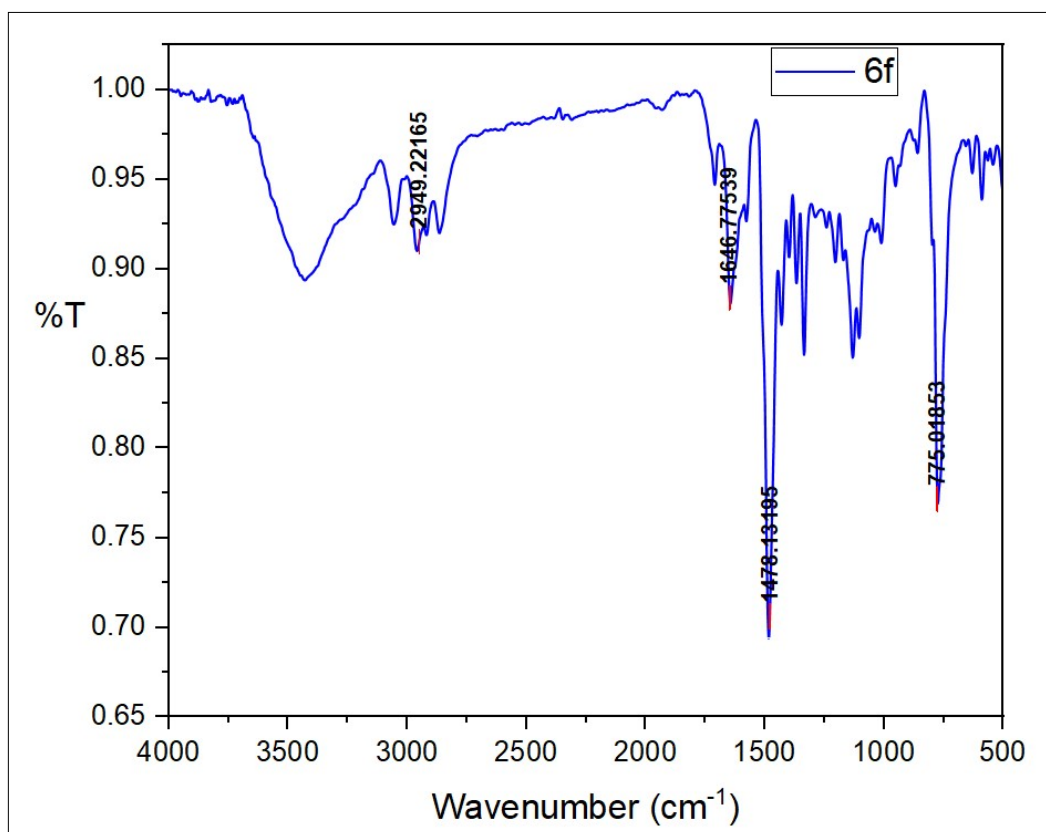

Fig S28: FT-IR Spectrum of compound 6f



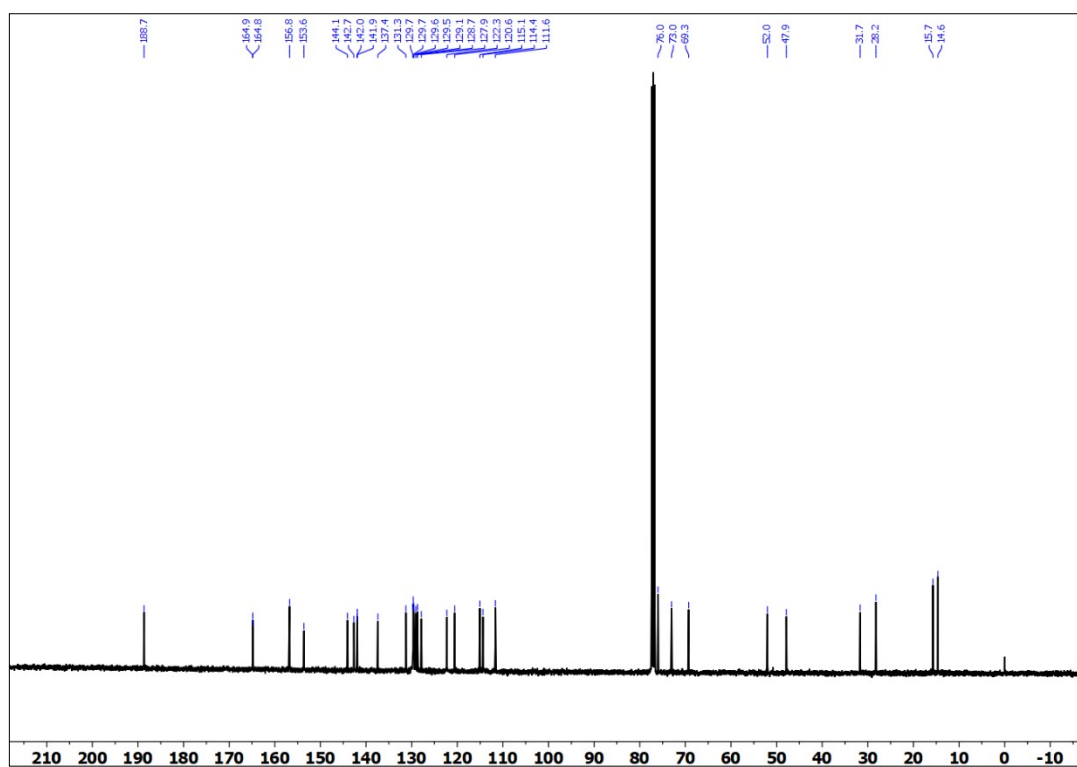Fig S31: <sup>13</sup>C NMR Spectrum of compound **6g**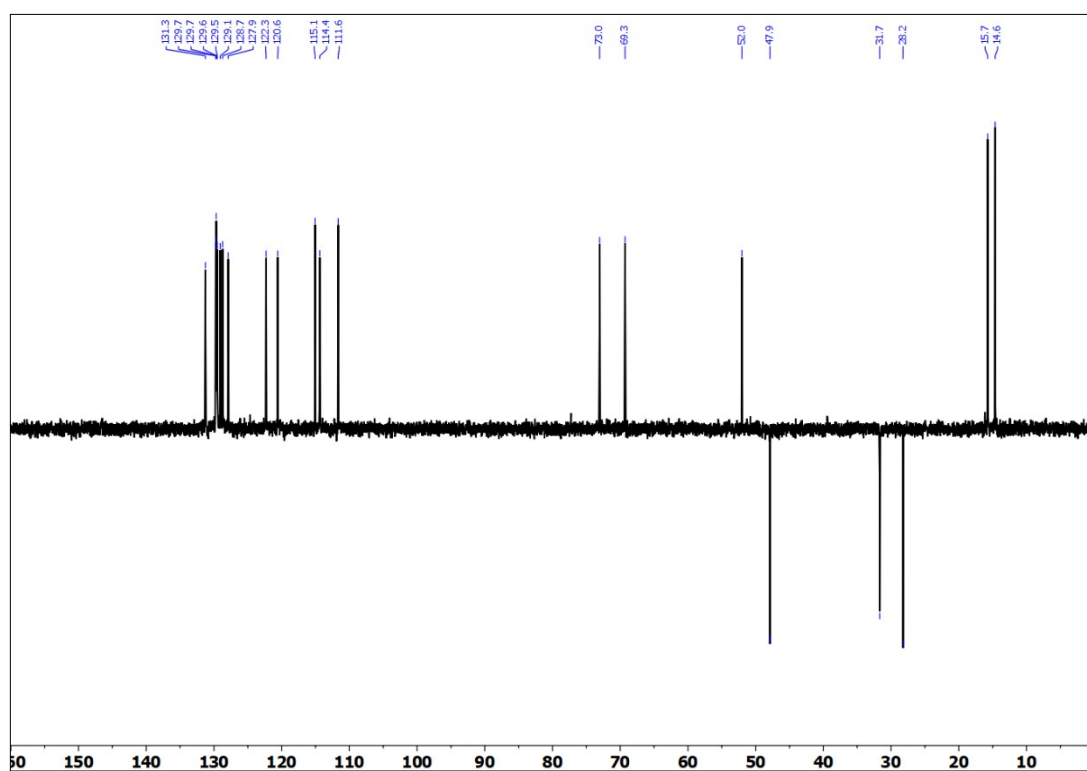Fig S32: DEPT-135 NMR Spectrum of compound **6g**

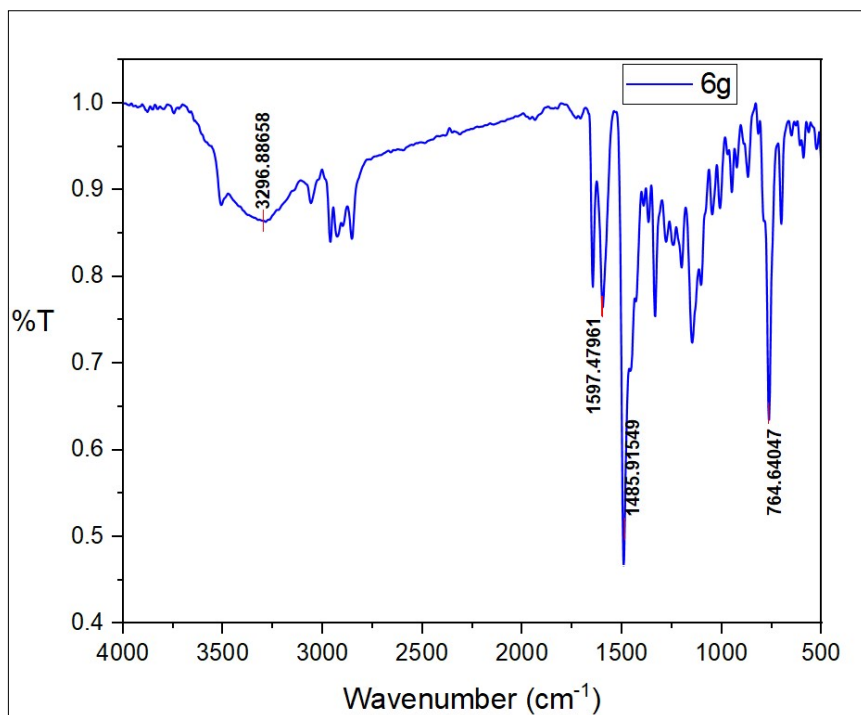

Fig S33: FT-IR Spectrum of compound 6g

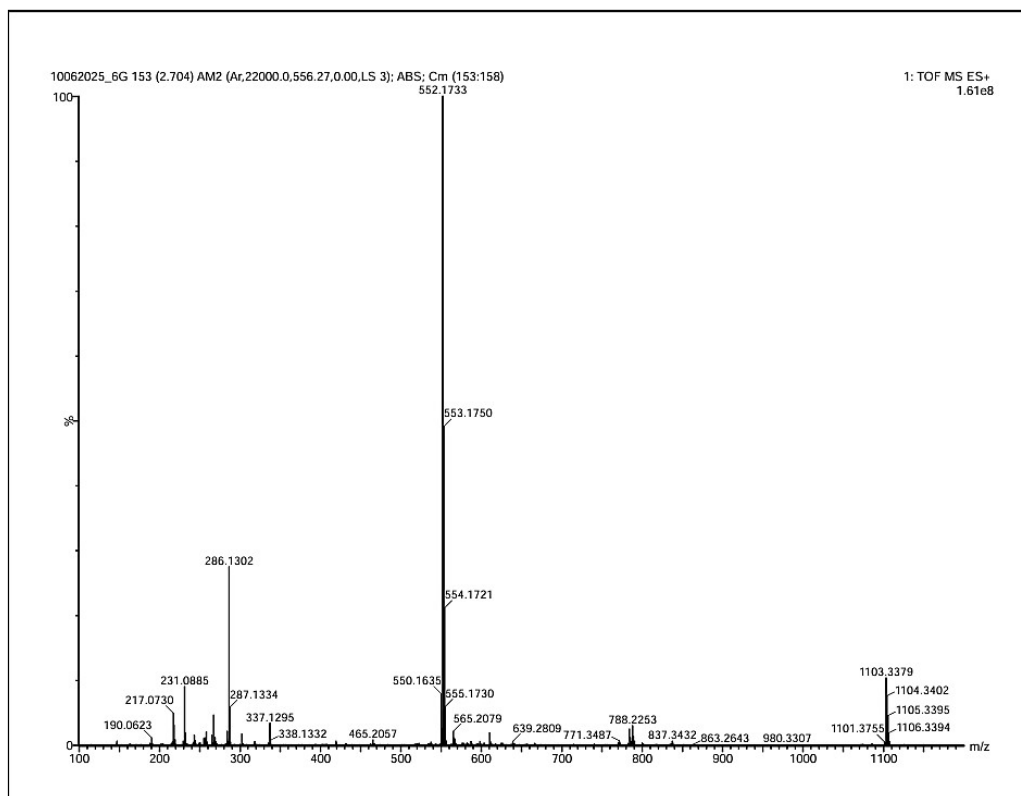

Fig S34: HRMS Spectrum of compound 6g

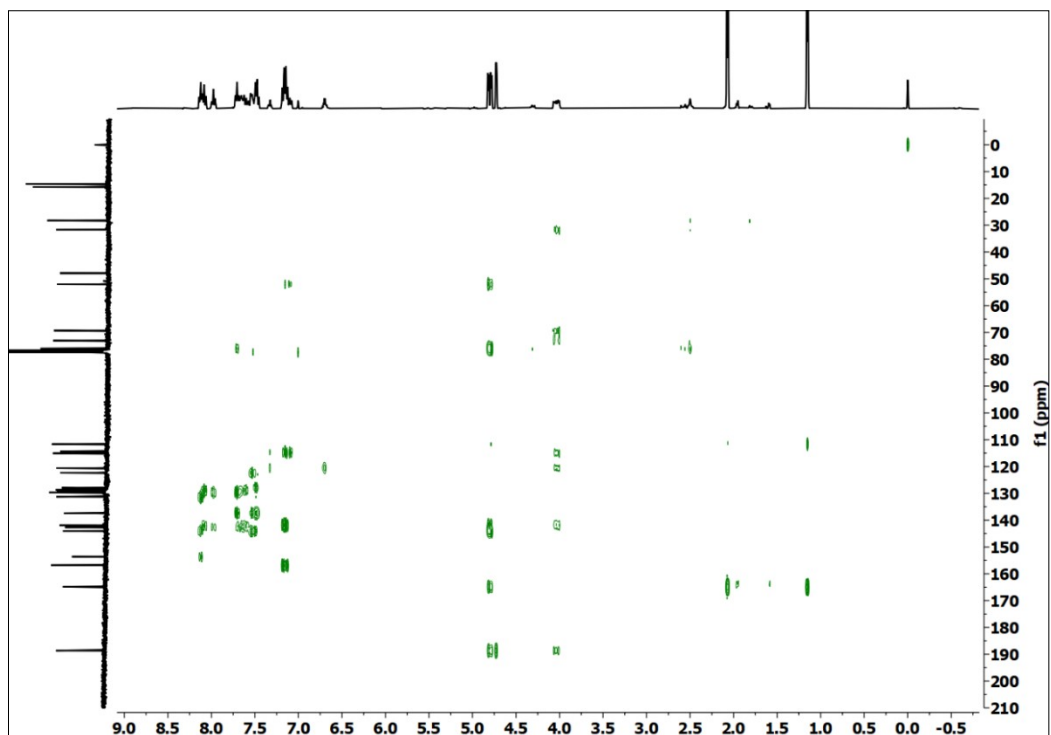Fig S35:  $^{13}\text{C}$ - $^1\text{H}$  Spectrum of compound 6g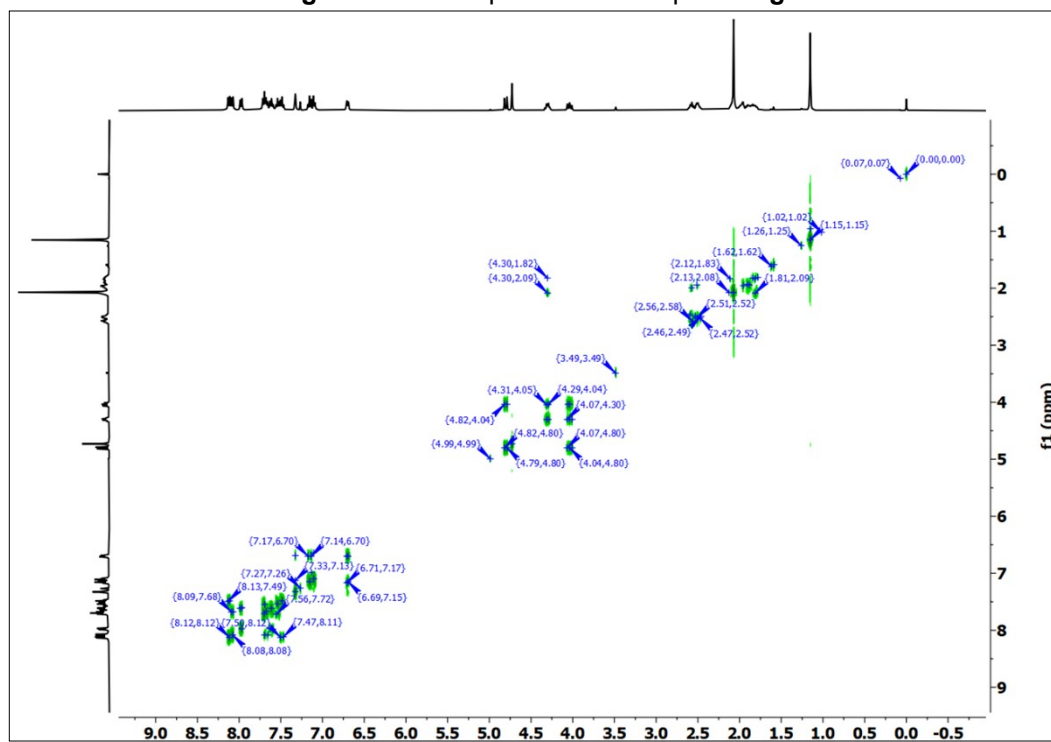Fig S36:  $^1\text{H}$ - $^1\text{H}$  Spectrum of compound 6g

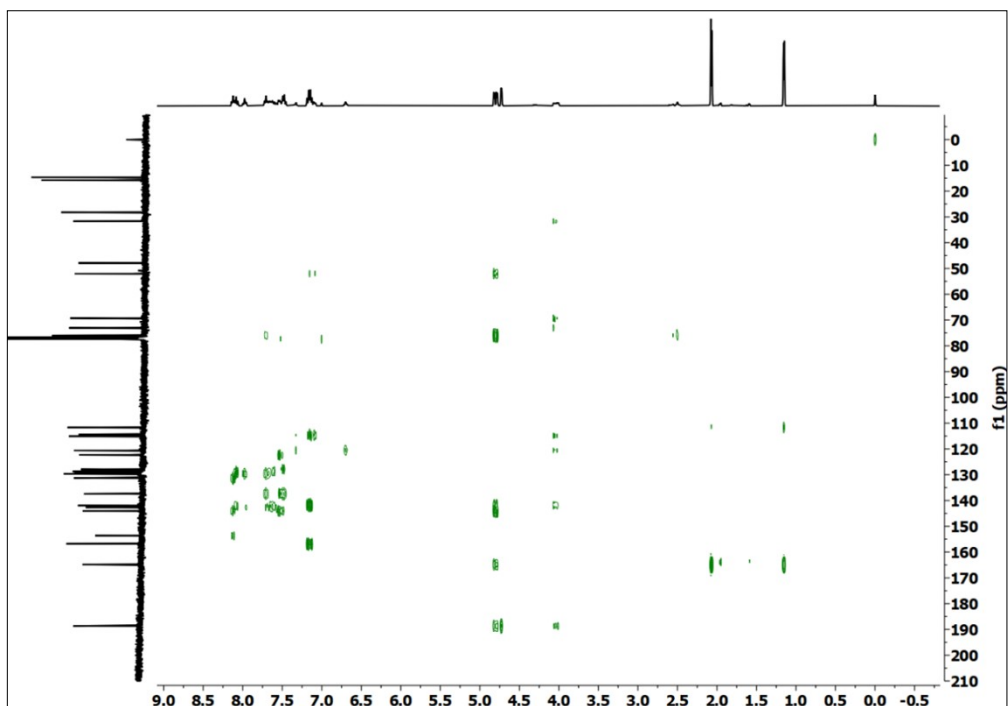

Fig S37: HMBC Spectrum of compound 6g

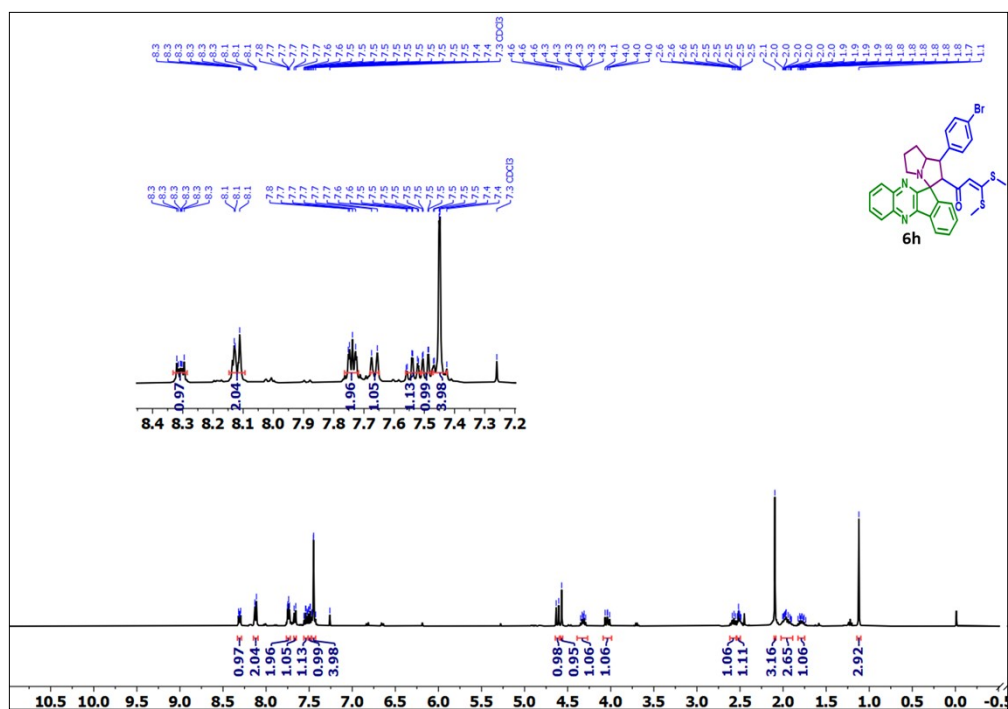Fig S38:  $^1\text{H}$  NMR Spectrum of compound 6h

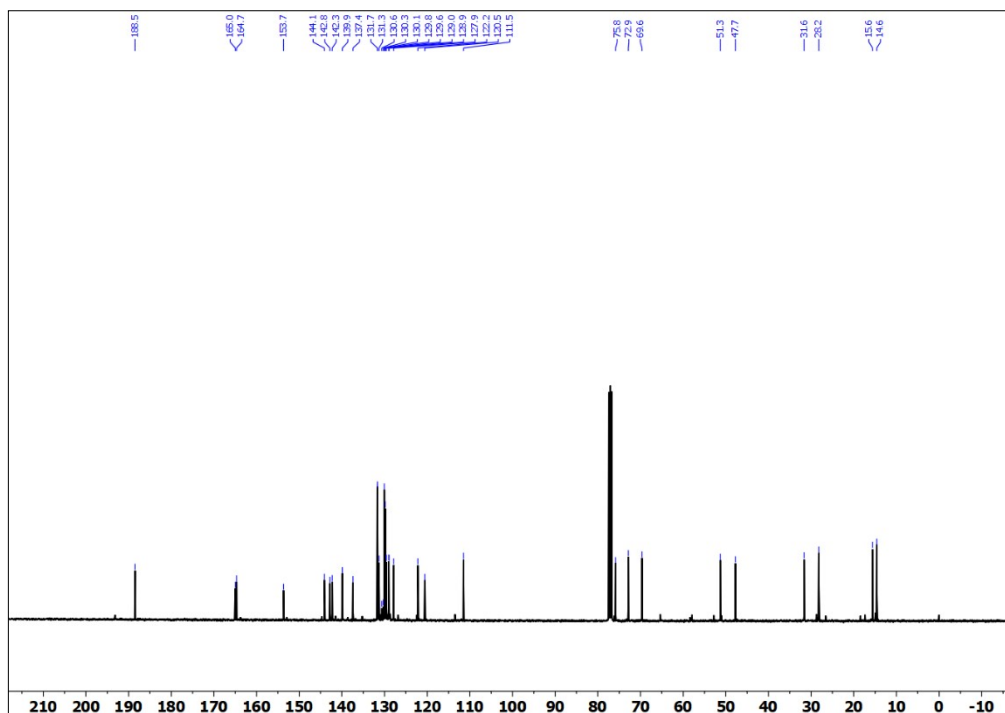Fig S39: <sup>13</sup>C NMR Spectrum of compound 6h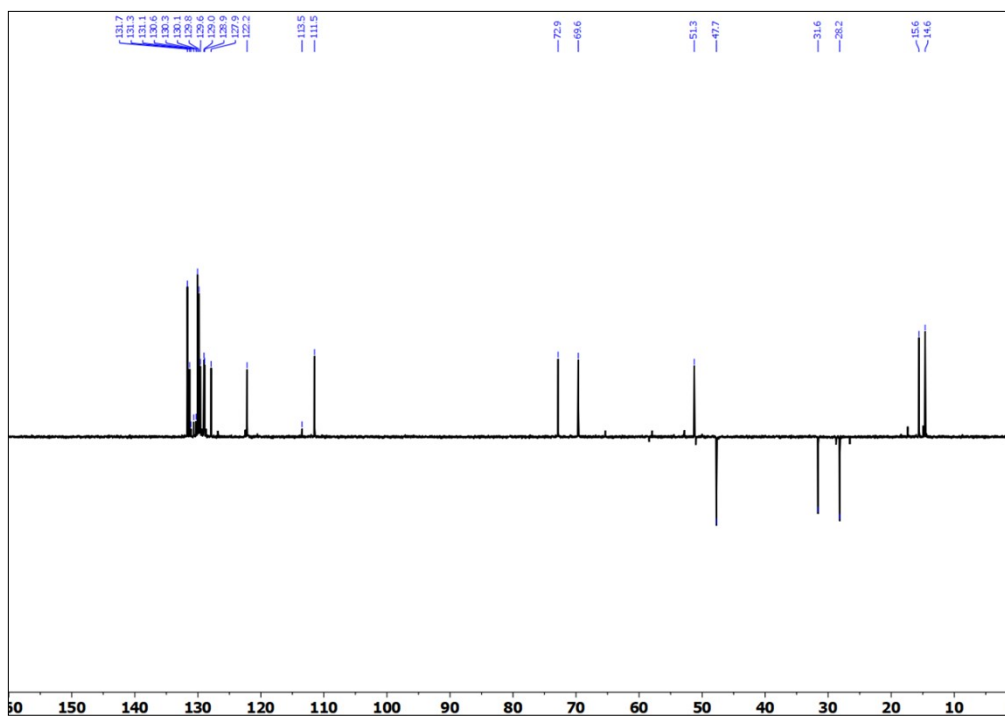

Fig S40: DEPT-135 NMR Spectrum of compound 6h

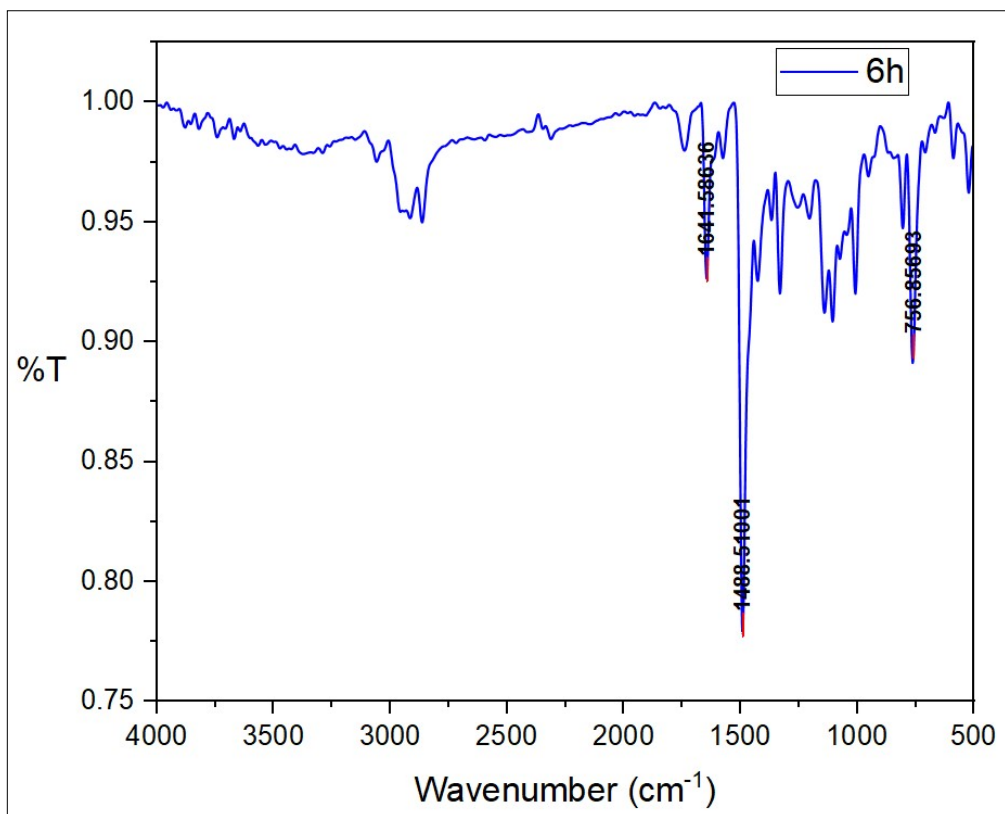

Fig S41: FT-IR Spectrum of compound 6h

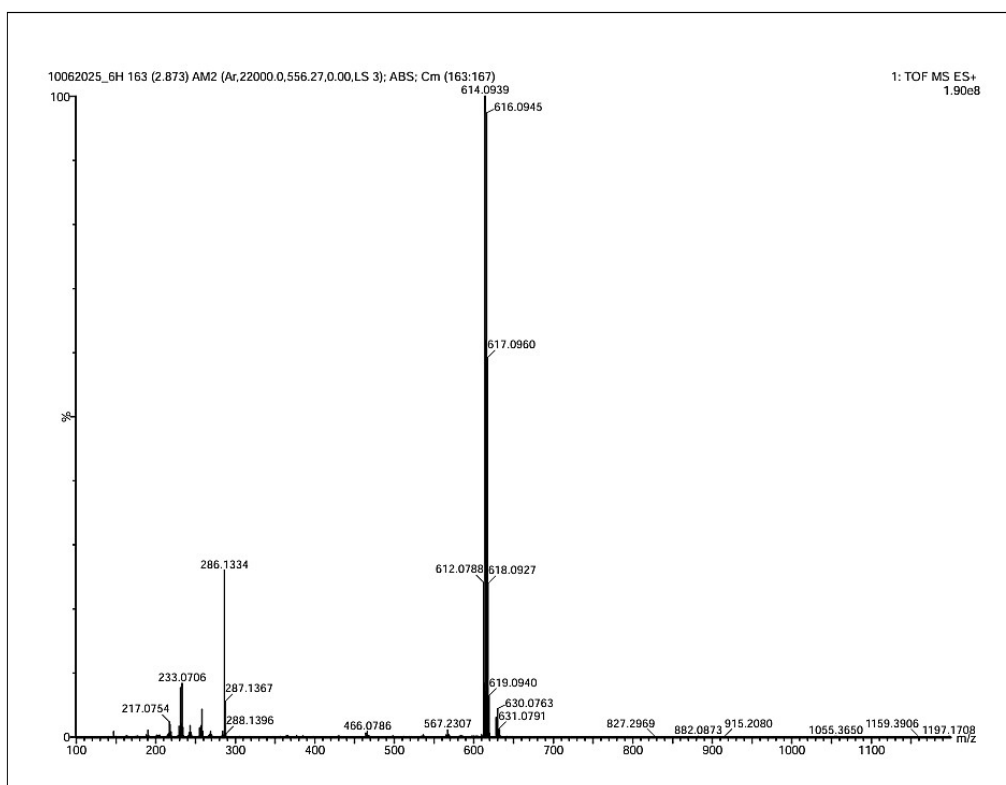

Fig S42: HRMS Spectrum of compound 6h



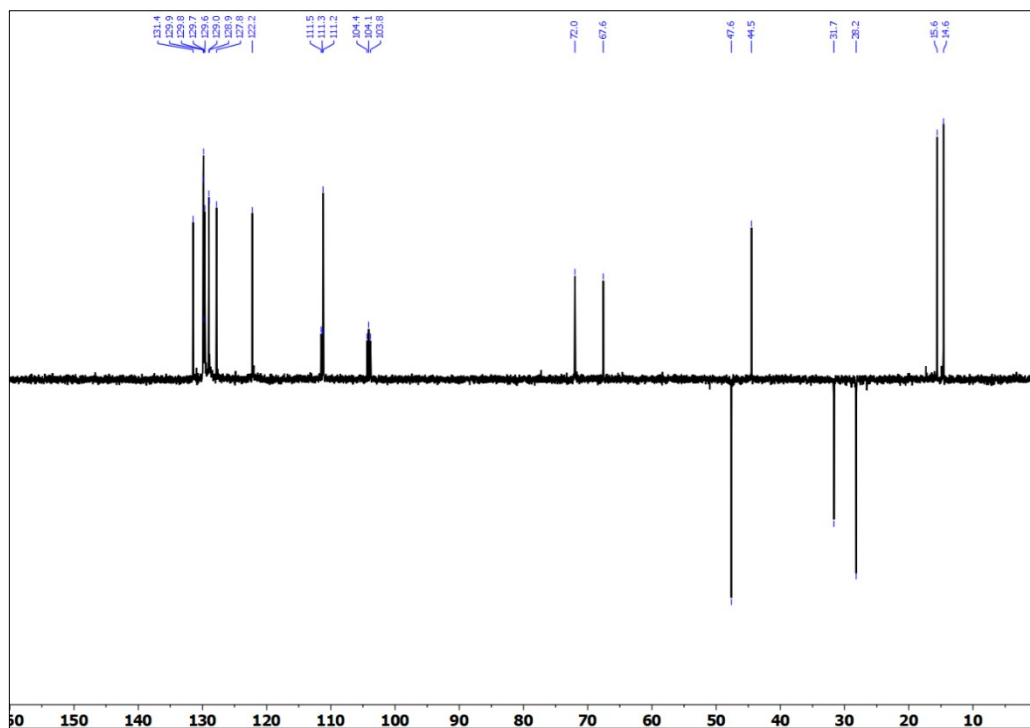

Fig S45: DEPT-135 NMR Spectrum of compound 6i

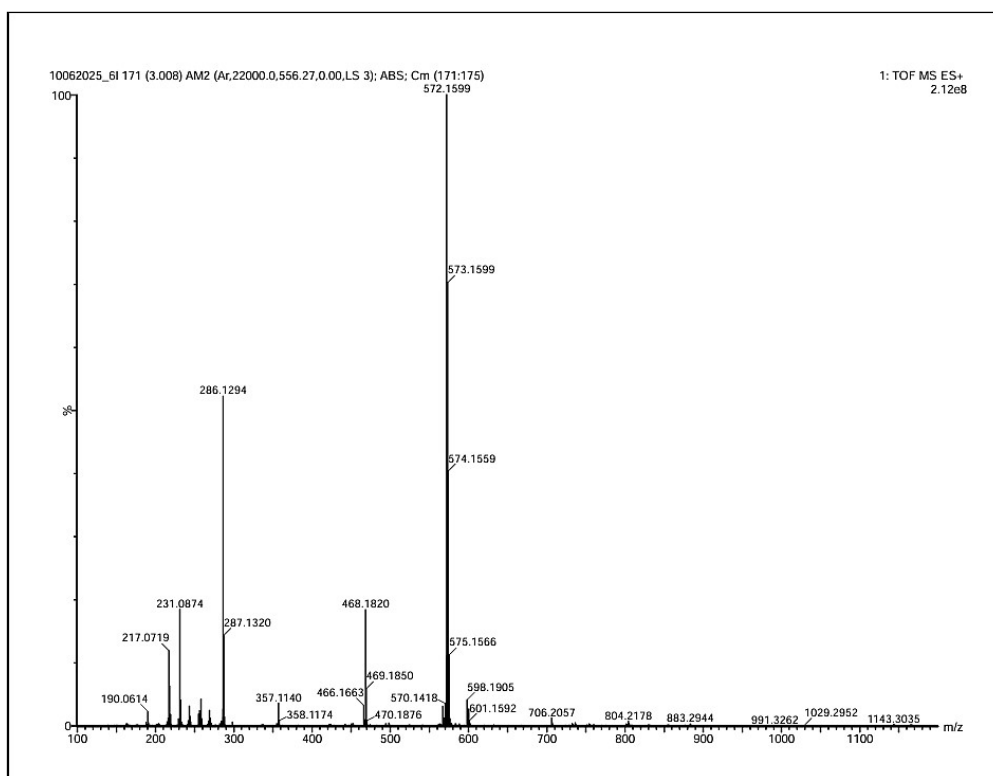

Fig S46: HRMS Spectrum of compound 6i

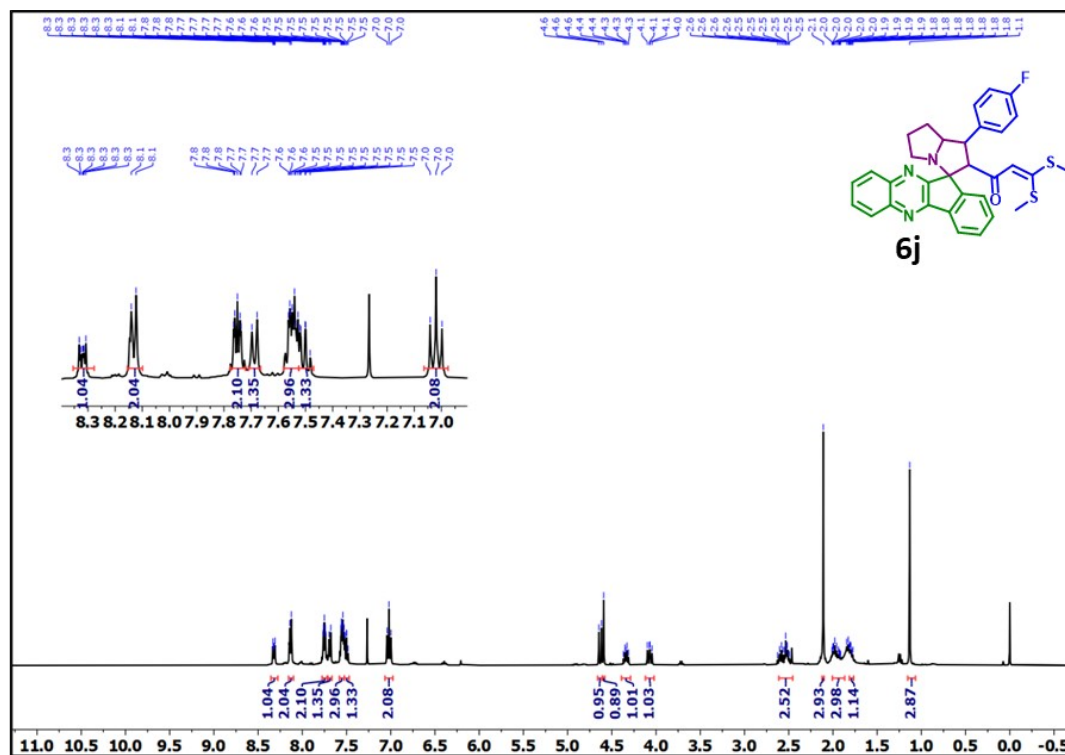Fig S47: <sup>1</sup>H NMR Spectrum of compound **6j**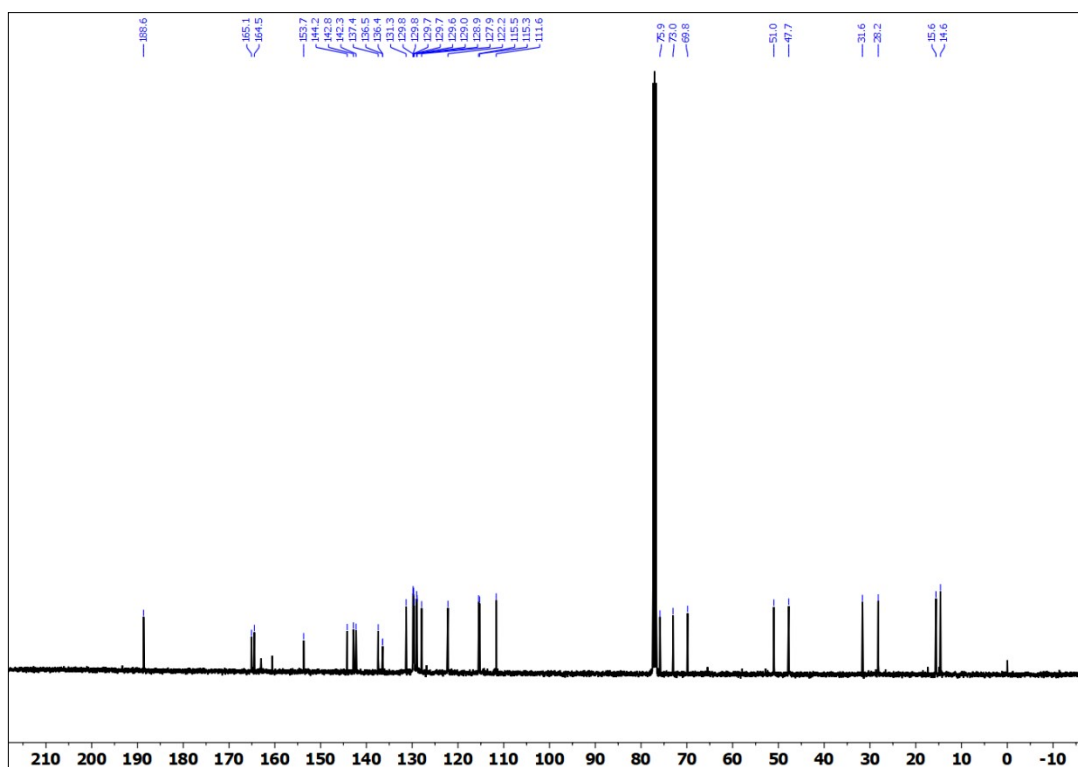Fig S48: <sup>13</sup>C NMR Spectrum of compound **6j**

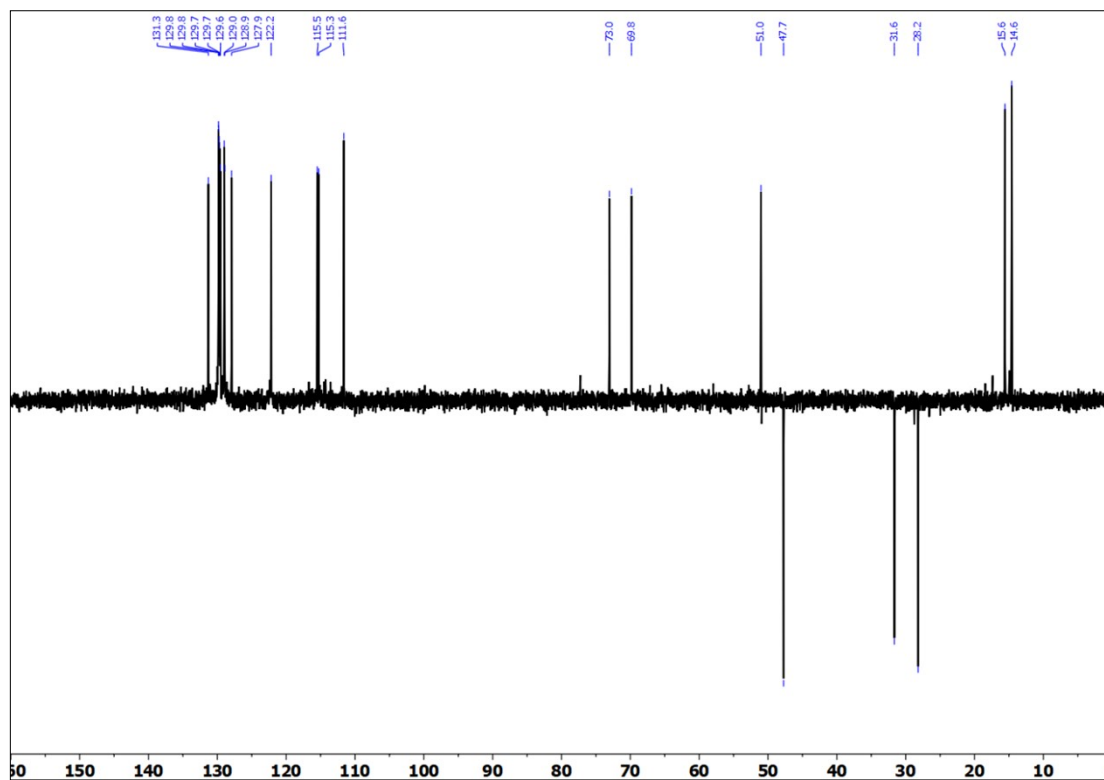

Fig S49: DEPT-135 NMR Spectrum of compound 6j

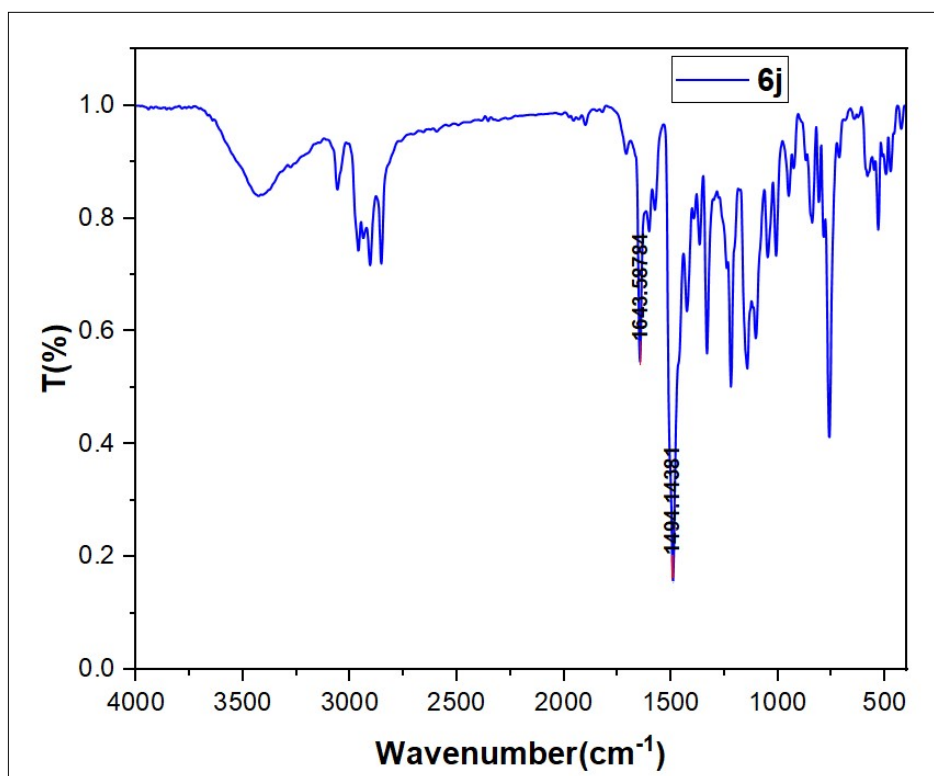

Fig S50: FT-IR Spectrum of compound 6j

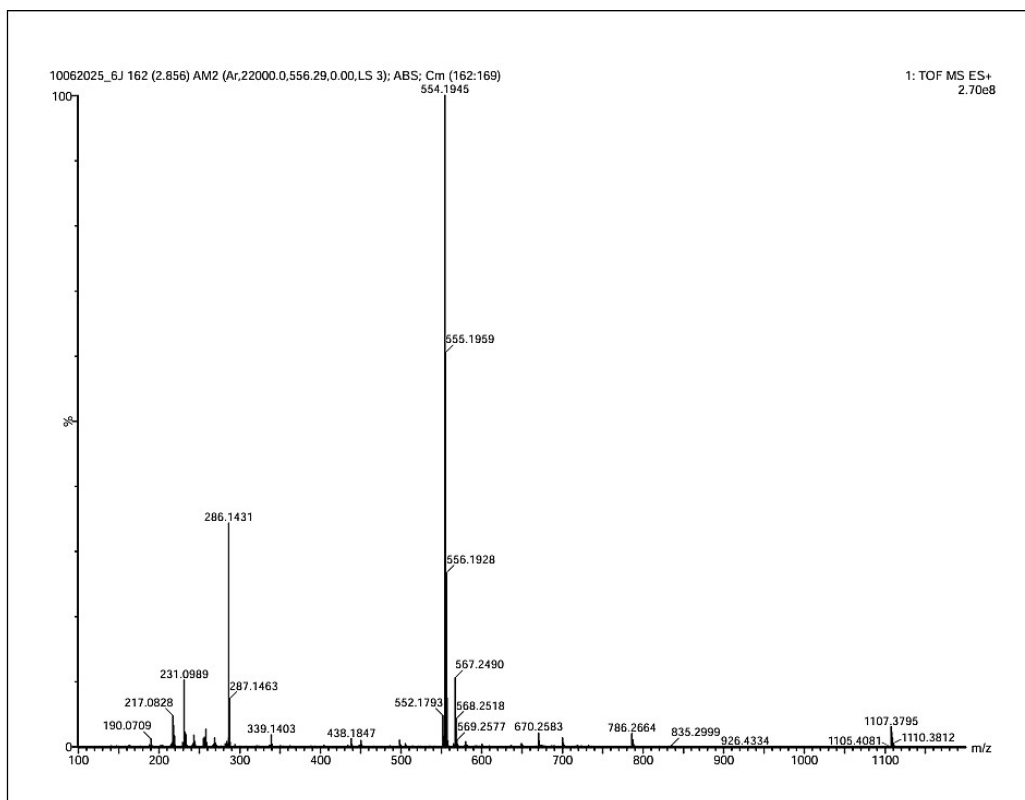

Fig S51: HRMS Spectrum of compound 6j

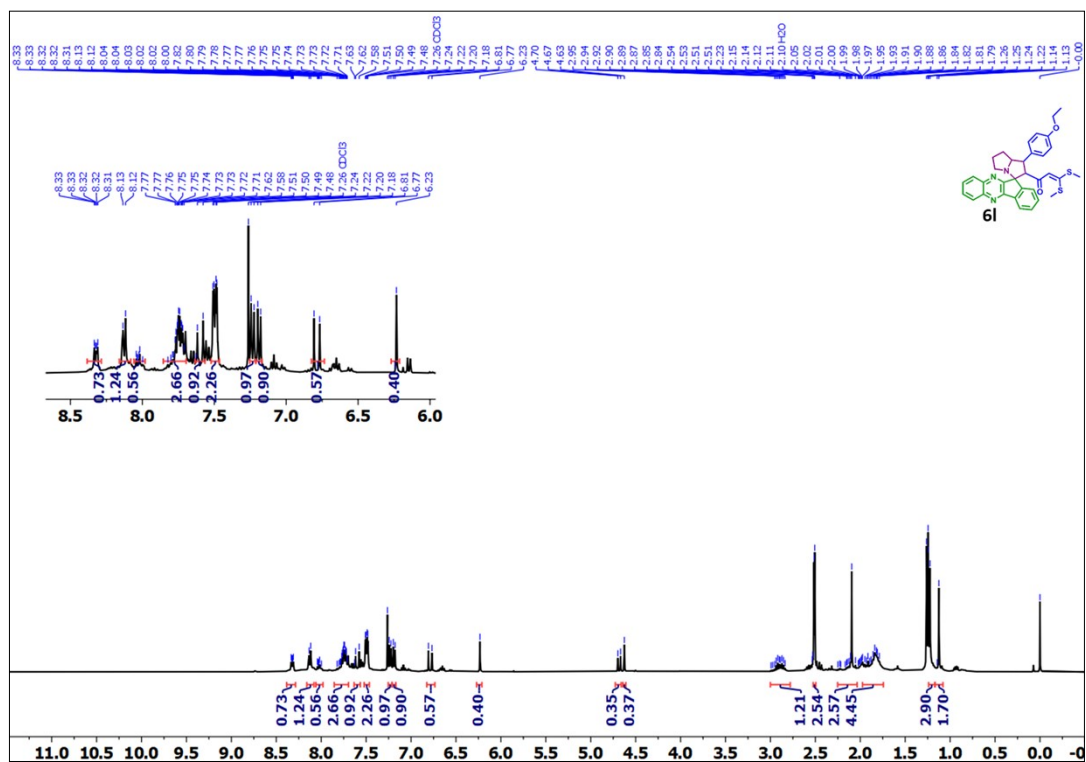Fig S52: <sup>1</sup>H NMR Spectrum of compound 6k

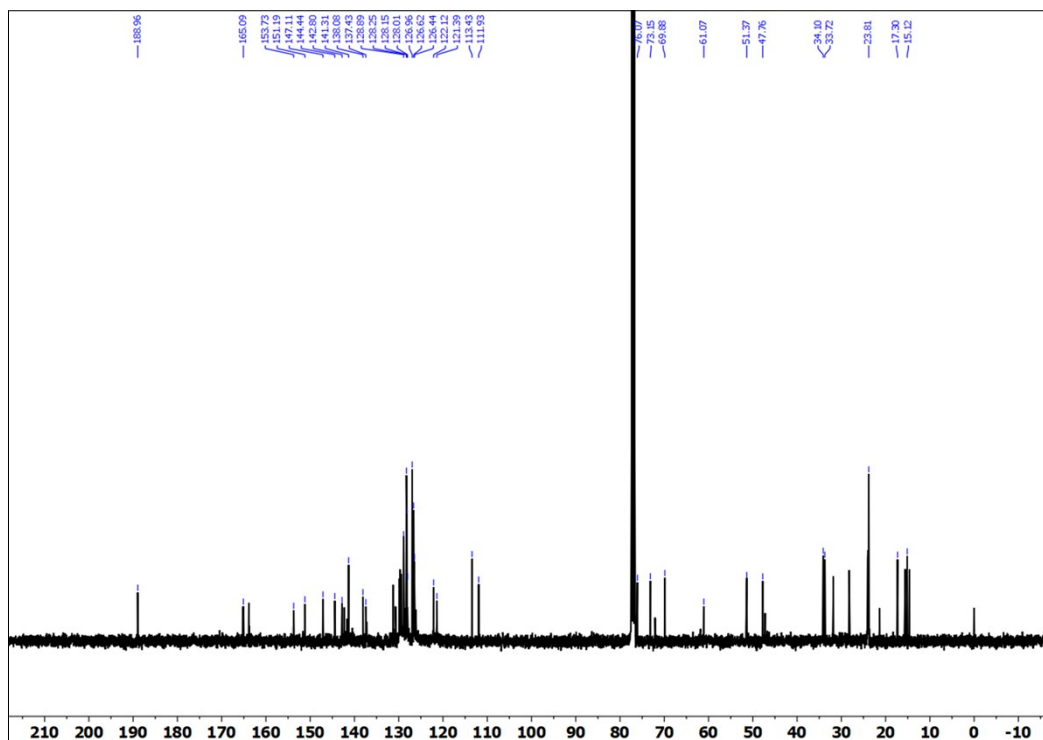

Fig S53:  $^{13}\text{C}$  NMR Spectrum of compound 6k

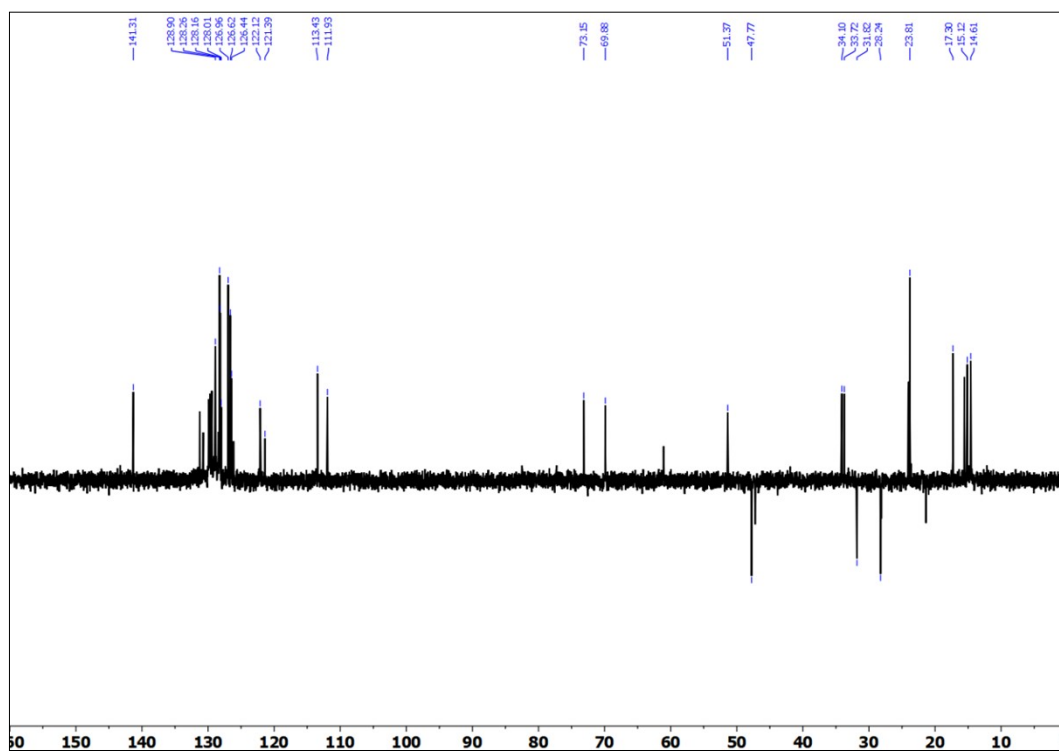

Fig S54: DEPT-135 NMR Spectrum of compound 6k

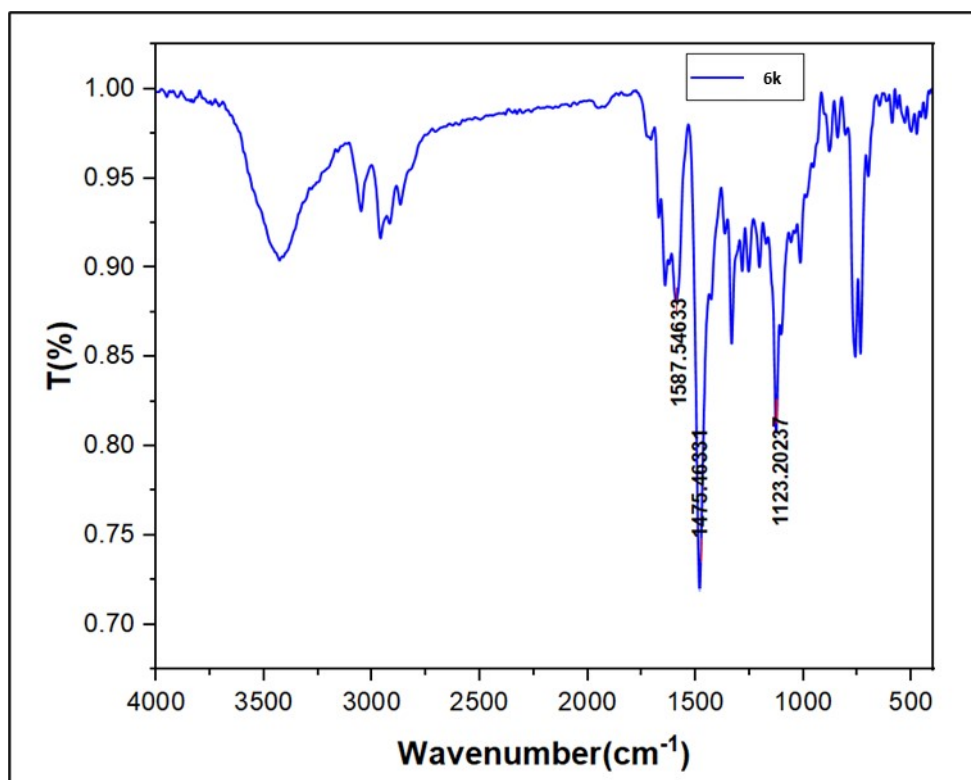

Fig S55: FT-IR Spectrum of compound 6k

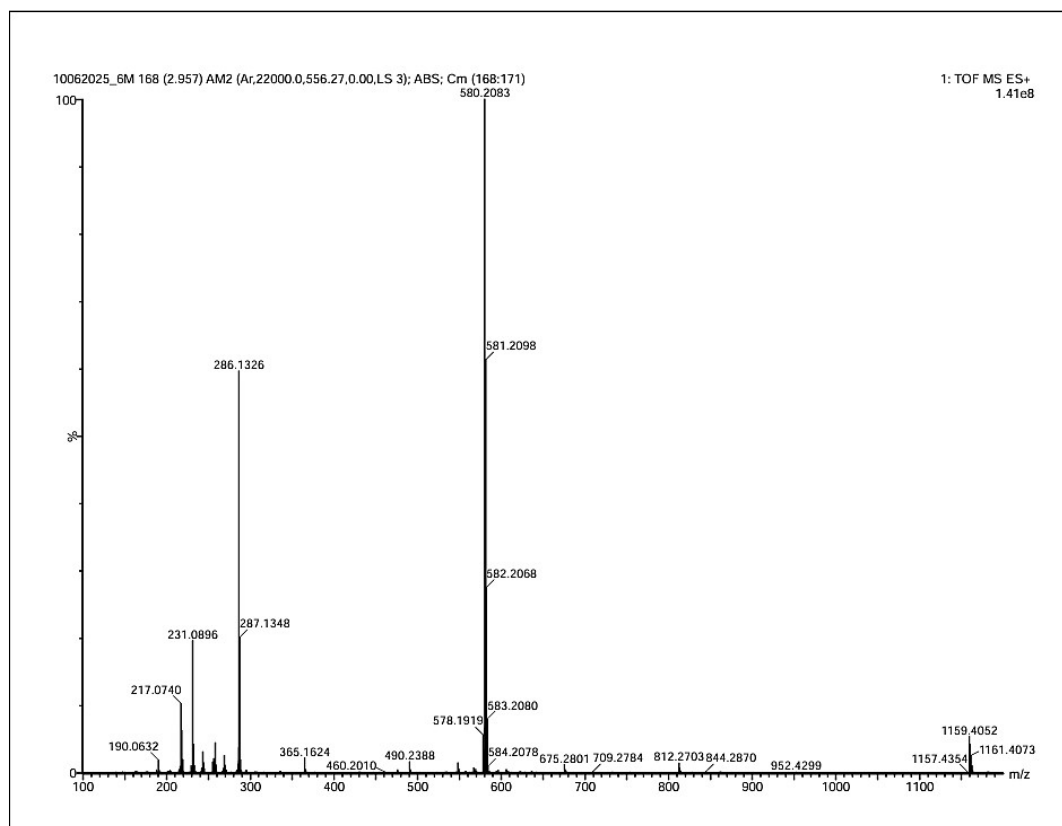

Fig S56: HRMS Spectrum of compound 6k

## 2. Biological Data Table of Compound 6f, g, and h.

| Compounds | Pathogen             | 125 µg/mL  | 100 µg/mL  | 75 µg/mL   | 50 µg/mL   | 25 µg/mL   |
|-----------|----------------------|------------|------------|------------|------------|------------|
| 6h        | <i>S. agalactiae</i> | 99.1 ± 2.2 | 97.0 ± 2.1 | 89.5 ± 2.3 | 62.6 ± 2.0 | 58.4 ± 1.9 |
|           | <i>S. pyogenes</i>   | 95.8 ± 2.0 | 93.0 ± 2.0 | 50.2 ± 2.0 | 41.8 ± 1.8 | 37.9 ± 1.6 |
|           | <i>P. aeruginosa</i> | 94.4 ± 1.9 | 94.0 ± 2.1 | 62.0 ± 2.0 | 40.2 ± 1.7 | 24.3 ± 1.5 |
| 6f        | <i>S. agalactiae</i> | 96.9 ± 2.0 | 94.1 ± 1.8 | 91.6 ± 2.5 | 66.7 ± 3.5 | 34.7 ± 4.0 |
|           | <i>S. pyogenes</i>   | 99.1 ± 3.0 | 86.6 ± 3.0 | 48.9 ± 4.0 | 45.1 ± 2.5 | 16.5 ± 2.0 |
|           | <i>P. aeruginosa</i> | 94.5 ± 2.5 | 90.9 ± 2.0 | 72.2 ± 3.0 | 19.1 ± 2.5 | 12.1 ± 2.0 |
| 6g        | <i>S. agalactiae</i> | 95.0 ± 2.0 | 93.7 ± 1.9 | 84.8 ± 2.5 | 66.1 ± 2.2 | -          |
|           | <i>S. pyogenes</i>   | 99.6 ± 2.1 | 93.6 ± 2.0 | 77.5 ± 2.4 | 69.5 ± 2.1 | 56.7 ± 1.7 |
|           | <i>P. aeruginosa</i> | 98.8 ± 2.0 | 96.9 ± 2.1 | 91.7 ± 2.3 | 49.9 ± 1.8 | 27.4 ± 1.5 |

**Table S1:** Minimum inhibitory concentration (MIC) values of compounds **6f**, **6g**, and **6h** at concentrations against multidrug-resistant pathogens (*Streptococcus agalactiae*, *Streptococcus pyogenes*, and *Pseudomonas aeruginosa*). Results are expressed as percentage inhibition at concentrations ranging from 25-125 µg/mL (mean ± SD, n=3).

| Concentration (µg/mL) | Compound 6f (% Inhibition, mean ± SD) | Compound 6g (% Inhibition, mean ± SD) | Compound 6h (% Inhibition, mean ± SD) |
|-----------------------|---------------------------------------|---------------------------------------|---------------------------------------|
| 5                     | 10.0 ± 1.2                            | 8.8 ± 0.8                             | 11.2 ± 1.0                            |
| 10                    | 12.4 ± 1.0                            | 14.4 ± 1.2                            | 14.4 ± 1.1                            |
| 25                    | 18.0 ± 1.5                            | 11.2 ± 1.1                            | 15.6 ± 1.4                            |
| 50                    | 30.0 ± 2.0                            | 14.0 ± 1.3                            | 18.8 ± 1.6                            |
| 100                   | 31.6 ± 2.1                            | 32.8 ± 2.2                            | 24.4 ± 1.9                            |

**Table S2.** DPPH Radical Scavenging Activity of Compounds **6f**, **6g**, and **6h** at concentrations of 5-100 µg/mL. Results are expressed as percentage inhibition relative to negative control (mean ± SD, n=3).

## 4. Docking results of Compound 6g.

| Index | Residue | AA  | Distance | Ligand Atom | Protein Atom |
|-------|---------|-----|----------|-------------|--------------|
| 1     | 12B     | ARG | 3.76     | 3057        | 84           |
| 2     | 181B    | TYR | 3.58     | 3073        | 1642         |
| 3     | 185B    | GLN | 3.56     | 3074        | 1677         |
| 4     | 187B    | ILE | 3.24     | 3077        | 1699         |
| 5     | 187B    | ILE | 3.86     | 3066        | 1698         |

| Index | Residue | AA  | Distance H-A | Distance D-A | Donor Angle | Protein donor? | Side chain | Donor Atom  | Acceptor Atom |
|-------|---------|-----|--------------|--------------|-------------|----------------|------------|-------------|---------------|
| 1     | 187B    | ILE | 2.03         | 2.93         | 154.54      | ×              | ×          | 3078 [O3]   | 1697 [O2]     |
| 2     | 204B    | ALA | 1.73         | 2.65         | 147.18      | ✓              | ×          | 1858 [N am] | 3078 [O3]     |

**Table S3.** Summary of the **hydrogen bonding, hydrophobic contacts, and π-stacking interactions** between the **6g** and the **A-GAPDH (6IEP) Binding Pocket**.

| Index | Residue | AA  | Distance | Ligand Atom | Protein Atom |
|-------|---------|-----|----------|-------------|--------------|
| 1     | 152A    | PRO | 3.10     | 4340        | 1421         |
| 2     | 153A    | PHE | 3.17     | 4338        | 1431         |

|   |      |     |      |      |      |
|---|------|-----|------|------|------|
| 3 | 326A | ILE | 3.84 | 4333 | 2936 |
| 4 | 379A | PHE | 3.77 | 4339 | 3427 |

| Index | Residue | AA  | Distance H-A | Distance D-A | Donor Angle | Protein donor? | Side chain | Donor Atom | Acceptor Atom |
|-------|---------|-----|--------------|--------------|-------------|----------------|------------|------------|---------------|
| 1     | 231A    | SER | 2.43         | 3.36         | 156.17      | ✓              | ✓          | 2101 [O3]  | 4366 [O3]     |
| 2     | 231A    | SER | 2.00         | 2.94         | 151.57      | ✓              | ×          | 2096 [Nam] | 4353 [O2]     |

| Index | Residue | AA  | Distance | Angle | Offset | Stacking Type | Ligand Atoms                       |
|-------|---------|-----|----------|-------|--------|---------------|------------------------------------|
| 1     | 379A    | PHE | 4.75     | 20.84 | 1.03   | P             | 4342, 4343, 4344, 4346, 4350, 4351 |

Table S4. Summary of the **hydrogen bonding, hydrophobic contacts, and  $\pi$ -stacking interactions** between the **6g** and the **B-npGAPDH (7PKJ) Binding Pocket**.

| Index | Residue | AA  | Distance | Ligand Atom | Protein Atom |
|-------|---------|-----|----------|-------------|--------------|
| 1     | 122B    | PRO | 3.68     | 4440        | 744          |
| 2     | 230B    | ASN | 3.91     | 4449        | 1706         |
| 3     | 300B    | VAL | 3.18     | 4419        | 2366         |
| 4     | 301B    | PHE | 3.55     | 4440        | 2378         |
| 5     | 301B    | PHE | 3.46     | 4424        | 2376         |
| 6     | 342B    | ALA | 3.96     | 4425        | 2741         |
| 7     | 532B    | HIS | 3.57     | 4434        | 4362         |
| 8     | 533B    | ASP | 3.13     | 4435        | 4375         |

| Index | Residue | AA  | Distance H-A | Distance D-A | Donor Angle | Protein donor? | Side chain | Donor Atom | Acceptor Atom |
|-------|---------|-----|--------------|--------------|-------------|----------------|------------|------------|---------------|
| 1     | 148B    | SER | 2.86         | 3.57         | 132.25      | ✓              | ✓          | 989 [O3]   | 4436 [N ar]   |
| 2     | 230B    | ASN | 2.03         | 2.71         | 126.81      | ×              | ✓          | 4452 [O3]  | 1708 [O2]     |

| Index | Residue | AA  | Distance | Offset | Protein charged? | Ligand Group | Ligand Atoms                       |
|-------|---------|-----|----------|--------|------------------|--------------|------------------------------------|
| 1     | 532B    | HIS | 5.52     | 1.66   | ✓                | Aromatic     | 4446, 4447, 4448, 4449, 4450, 4451 |

| Index | Residue | AA  | Distance | Protein positive? | Ligand Group | Ligand Atoms |
|-------|---------|-----|----------|-------------------|--------------|--------------|
| 1     | 302B    | GLU | 5.01     | ×                 | Tertamine    | 4421         |

Table S5. Summary of the **hydrogen bonding, hydrophobic contacts, and  $\pi$ -stacking interactions** between the **6g** and the **C-Aminopeptidase (8AC7) Binding Pocket**.

## 5. DFT results of Compound 6g

| <b>6g endo</b><br>4797.4608409484 Hartrees (12,595,204.09 kJ/mol)                        | <b>6g exo</b><br>4846.7105360983 Hartrees (12,725,038.5125 kJ/mol)                       |
|------------------------------------------------------------------------------------------|------------------------------------------------------------------------------------------|
| 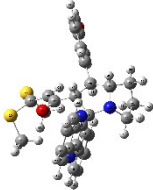      |      |
| Stoichiometry C32H29N3O2S2<br>Framework group C1[X(C32H29N3O2S2)]<br>Deg. of freedom 198 | Stoichiometry C32H29N3O2S2<br>Framework group C1[X(C32H29N3O2S2)]<br>Deg. of freedom 198 |

| Full point group C1 NOp 1                 |        |             |             |           |           | Full point group C1 NOp 1                 |        |             |             |           |           |
|-------------------------------------------|--------|-------------|-------------|-----------|-----------|-------------------------------------------|--------|-------------|-------------|-----------|-----------|
| Largest Abelian subgroup C1 NOp 1         |        |             |             |           |           | Largest Abelian subgroup C1 NOp 1         |        |             |             |           |           |
| Largest concise Abelian subgroup C1 NOp 1 |        |             |             |           |           | Largest concise Abelian subgroup C1 NOp 1 |        |             |             |           |           |
| Standard orientation:                     |        |             |             |           |           | Standard orientation:                     |        |             |             |           |           |
| Center                                    | Atomic | Atomic      | Coordinates |           |           | Center                                    | Atomic | Atomic      | Coordinates |           |           |
| Number                                    | Number | Type        | X           | Y         | Z         | Number                                    | Number | Type        | X           | Y         | Z         |
|                                           |        | (Angstroms) |             |           |           |                                           |        | (Angstroms) |             |           |           |
| 1                                         | 6      | 0           | 3.070582    | 0.642994  | 0.520125  | 1                                         | 6      | 0           | -2.922790   | 0.210034  | 0.862730  |
| 2                                         | 6      | 0           | 2.355081    | -0.531150 | 0.116050  | 2                                         | 6      | 0           | -2.182098   | -0.747458 | 0.215522  |
| 3                                         | 6      | 0           | 1.017831    | -0.642771 | 0.857010  | 3                                         | 6      | 0           | -0.811527   | -0.942449 | 0.862107  |
| 4                                         | 6      | 0           | 1.060920    | 0.642322  | 1.716265  | 4                                         | 6      | 0           | -0.946743   | 0.066368  | 2.021083  |
| 5                                         | 6      | 0           | 0.116517    | 1.129755  | 2.618911  | 5                                         | 6      | 0           | -0.053605   | 0.375743  | 3.063767  |
| 6                                         | 6      | 0           | 0.373801    | 2.331790  | 3.298229  | 6                                         | 6      | 0           | -0.412203   | 1.348023  | 4.011627  |
| 7                                         | 6      | 0           | 1.566270    | 3.039537  | 3.079340  | 7                                         | 6      | 0           | -1.652013   | 2.002891  | 3.930840  |
| 8                                         | 6      | 0           | 2.521711    | 2.556915  | 2.176926  | 8                                         | 6      | 0           | -2.550795   | 1.683549  | 2.906917  |
| 9                                         | 6      | 0           | 2.260617    | 1.361395  | 1.503990  | 9                                         | 6      | 0           | -2.176049   | 0.715468  | 1.977225  |
| 10                                        | 7      | 0           | 2.814617    | -1.377998 | -0.775437 | 10                                        | 7      | 0           | -2.677763   | -1.349458 | -0.897973 |
| 11                                        | 7      | 0           | 4.258069    | 0.971346  | 0.038159  | 11                                        | 7      | 0           | -4.161588   | 0.568892  | 0.444614  |
| 12                                        | 6      | 0           | 4.630693    | -1.941450 | -2.272545 | 12                                        | 6      | 0           | -4.450610   | -1.636872 | -2.487686 |
| 13                                        | 6      | 0           | 5.871541    | -1.655926 | -2.813961 | 13                                        | 6      | 0           | -5.727435   | -1.287367 | -2.940563 |
| 14                                        | 6      | 0           | 6.584715    | -0.498051 | -2.409020 | 14                                        | 6      | 0           | -6.477975   | -0.320346 | -2.261189 |
| 15                                        | 6      | 0           | 6.050027    | 0.363077  | -1.467933 | 15                                        | 6      | 0           | -5.958134   | 0.306067  | -1.123183 |
| 16                                        | 6      | 0           | 4.781851    | 0.094323  | -0.898308 | 16                                        | 6      | 0           | -4.683127   | -0.035406 | -0.660786 |
| 17                                        | 6      | 0           | 4.062074    | -1.078262 | -1.307200 | 17                                        | 6      | 0           | -3.921084   | -1.018300 | -1.350894 |
| 18                                        | 7      | 0           | 0.870011    | -1.895036 | 1.608987  | 18                                        | 7      | 0           | -0.517537   | -2.281285 | 1.440544  |
| 19                                        | 6      | 0           | -0.341730   | -2.657148 | 1.243199  | 19                                        | 6      | 0           | 0.916427    | -2.552544 | 1.161714  |
| 20                                        | 6      | 0           | -0.852778   | -3.274374 | 2.572387  | 20                                        | 6      | 0           | 0.942274    | -3.791204 | 0.256050  |
| 21                                        | 6      | 0           | -0.112075   | -2.494497 | 3.688896  | 21                                        | 6      | 0           | -0.215629   | -4.564474 | 0.834019  |
| 22                                        | 6      | 0           | 1.222844    | -2.081075 | 3.023932  | 22                                        | 6      | 0           | -1.242524   | -3.450006 | 0.894900  |
| 23                                        | 6      | 0           | 0.010429    | 4.010936  | -0.656066 | 23                                        | 6      | 0           | -0.286845   | 4.381451  | 0.238035  |
| 24                                        | 6      | 0           | -4.625630   | 4.286471  | -0.474657 | 24                                        | 6      | 0           | 4.100805    | 3.329546  | -1.769978 |
| 25                                        | 16     | 0           | -4.262976   | 2.478952  | -0.906923 | 25                                        | 16     | 0           | 3.318587    | 3.772509  | -0.188175 |
| 26                                        | 16     | 0           | -1.597993   | 3.812770  | -1.633950 | 26                                        | 16     | 0           | 0.481994    | 3.955735  | -1.356028 |
| 27                                        | 6      | 0           | -2.424046   | 2.363160  | -0.925066 | 27                                        | 6      | 0           | 1.770846    | 2.953469  | -0.592881 |
| 28                                        | 6      | 0           | -2.327216   | -2.210569 | -0.332860 | 28                                        | 6      | 0           | 2.815170    | -1.522307 | -0.241645 |
| 29                                        | 6      | 0           | -1.249211   | -1.602208 | 0.545606  | 29                                        | 6      | 0           | 1.540436    | -1.280416 | 0.555586  |
| 30                                        | 8      | 0           | 0.320527    | 1.240114  | -1.409636 | 30                                        | 8      | 0           | -0.533610   | 1.290417  | -1.147043 |
| 31                                        | 6      | 0           | -0.189505   | -0.727350 | -0.173254 | 31                                        | 6      | 0           | 0.331809    | -0.655686 | -0.147067 |
| 32                                        | 6      | 0           | -0.561916   | 0.643664  | -0.738845 | 32                                        | 6      | 0           | 0.427398    | 0.806546  | -0.569600 |
| 33                                        | 6      | 0           | -1.900831   | 1.175345  | -0.507423 | 33                                        | 6      | 0           | 1.636290    | 1.643349  | -0.302136 |
| 34                                        | 6      | 0           | -3.666730   | -2.153214 | 0.076831  | 34                                        | 6      | 0           | 3.930310    | -2.068140 | 0.419899  |
| 35                                        | 6      | 0           | -4.672700   | -2.747504 | -0.692636 | 35                                        | 6      | 0           | 5.125813    | -2.305696 | -0.266952 |
| 36                                        | 6      | 0           | -4.359944   | -3.408930 | -1.884354 | 36                                        | 6      | 0           | 5.217290    | -1.995789 | -1.630192 |
| 37                                        | 6      | 0           | -3.023405   | -3.470741 | -2.294401 | 37                                        | 6      | 0           | 4.119191    | -1.452197 | -2.298465 |
| 38                                        | 6      | 0           | -2.012440   | -2.882338 | -1.531057 | 38                                        | 6      | 0           | 2.924770    | -1.215394 | -1.613346 |
| 39                                        | 8      | 0           | -5.972979   | -2.643007 | -0.205145 | 39                                        | 8      | 0           | 6.177777    | -2.830402 | 0.393472  |
| 40                                        | 1      | 0           | -0.808375   | 0.593100  | 2.802025  | 40                                        | 1      | 0           | 0.896721    | -0.114021 | 3.179965  |
| 41                                        | 1      | 0           | -0.357078   | 2.715520  | 4.003221  | 41                                        | 1      | 0           | 0.270790    | 1.591877  | 4.815047  |
| 42                                        | 1      | 0           | 1.748806    | 3.964629  | 3.616861  | 42                                        | 1      | 0           | -1.917578   | 2.749253  | 4.668168  |
| 43                                        | 1      | 0           | 3.448663    | 3.090279  | 1.996754  | 43                                        | 1      | 0           | -3.513469   | 2.174316  | 2.843470  |
| 44                                        | 1      | 0           | 4.063324    | -2.818293 | -2.563503 | 44                                        | 1      | 0           | -3.877484   | -2.386107 | -3.019808 |
| 45                                        | 1      | 0           | 6.306058    | -2.319052 | -3.554863 | 45                                        | 1      | 0           | -6.136787   | -1.766982 | -3.820311 |
| 46                                        | 1      | 0           | 7.556387    | -0.289625 | -2.844882 | 46                                        | 1      | 0           | -7.464718   | -0.055692 | -2.618364 |
| 47                                        | 1      | 0           | 6.571502    | 1.255918  | -1.141819 | 47                                        | 1      | 0           | -6.545949   | 1.053772  | -0.605179 |
| 48                                        | 1      | 0           | -0.113774   | -3.450250 | 0.517079  | 48                                        | 1      | 0           | 1.429507    | -2.834522 | 2.109197  |
| 49                                        | 1      | 0           | -0.588739   | -4.337162 | 2.614320  | 49                                        | 1      | 0           | 1.914196    | -4.328860 | 0.251571  |
| 50                                        | 1      | 0           | -1.942432   | -3.206848 | 2.658730  | 50                                        | 1      | 0           | 0.687664    | -3.520074 | -0.794138 |
| 51                                        | 1      | 0           | -0.676759   | -1.597272 | 3.971961  | 51                                        | 1      | 0           | -0.532701   | -5.440738 | 0.229142  |
| 52                                        | 1      | 0           | 0.031386    | -3.094661 | 4.593247  | 52                                        | 1      | 0           | 0.036019    | -4.900774 | 1.866004  |

|                                                              |   |   |           |           |           |                                                              |   |   |           |           |           |
|--------------------------------------------------------------|---|---|-----------|-----------|-----------|--------------------------------------------------------------|---|---|-----------|-----------|-----------|
| 53                                                           | 1 | 0 | 1.975271  | -2.875136 | 3.139182  | 53                                                           | 1 | 0 | -2.134209 | -3.711298 | 1.502163  |
| 54                                                           | 1 | 0 | 1.640880  | -1.163896 | 3.448604  | 54                                                           | 1 | 0 | -1.552882 | -3.285377 | -0.154365 |
| 55                                                           | 1 | 0 | 0.335251  | 5.030763  | -0.868231 | 55                                                           | 1 | 0 | -1.167826 | 5.025590  | 0.040642  |
| 56                                                           | 1 | 0 | -0.195701 | 3.888835  | 0.407495  | 56                                                           | 1 | 0 | -0.645277 | 3.466838  | 0.755890  |
| 57                                                           | 1 | 0 | 0.721425  | 3.266054  | -1.003810 | 57                                                           | 1 | 0 | 0.422810  | 4.957055  | 0.868206  |
| 58                                                           | 1 | 0 | -5.705280 | 4.318519  | -0.316920 | 58                                                           | 1 | 0 | 5.124968  | 3.755104  | -1.785025 |
| 59                                                           | 1 | 0 | -4.102344 | 4.562389  | 0.440512  | 59                                                           | 1 | 0 | 4.187945  | 2.226582  | -1.864372 |
| 60                                                           | 1 | 0 | -4.340864 | 4.941114  | -1.295219 | 60                                                           | 1 | 0 | 3.536907  | 3.771431  | -2.617864 |
| 61                                                           | 1 | 0 | -1.735338 | -1.011826 | 1.335106  | 61                                                           | 1 | 0 | 1.809000  | -0.609050 | 1.383993  |
| 62                                                           | 1 | 0 | 0.209674  | -1.298708 | -1.021352 | 62                                                           | 1 | 0 | 0.131745  | -1.271675 | -1.052484 |
| 63                                                           | 1 | 0 | -2.600769 | 0.501571  | -0.027171 | 63                                                           | 1 | 0 | 2.488532  | 1.171677  | 0.169738  |
| 64                                                           | 1 | 0 | -3.952191 | -1.647592 | 0.993138  | 64                                                           | 1 | 0 | 3.870263  | -2.309177 | 1.474454  |
| 65                                                           | 1 | 0 | -5.142136 | -3.866793 | -2.483958 | 65                                                           | 1 | 0 | 6.137411  | -2.174814 | -2.171954 |
| 66                                                           | 1 | 0 | -2.772632 | -3.982076 | -3.218296 | 66                                                           | 1 | 0 | 4.193512  | -1.213018 | -3.351532 |
| 67                                                           | 1 | 0 | -0.983865 | -2.946293 | -1.869343 | 67                                                           | 1 | 0 | 2.098205  | -0.793003 | -2.165735 |
| 68                                                           | 1 | 0 | -6.618173 | -3.060542 | -0.807271 | 68                                                           | 1 | 0 | 7.022427  | -3.010109 | -0.043754 |
| -----                                                        |   |   |           |           |           | -----                                                        |   |   |           |           |           |
| Rotational constants (GHZ): 0.1077542 0.0683967<br>0.0575012 |   |   |           |           |           | Rotational constants (GHZ): 0.1107755 0.0711261<br>0.0580189 |   |   |           |           |           |
| Standard basis: 6-31G (6D, 7F)                               |   |   |           |           |           | Standard basis: 6-31G (6D, 7F)                               |   |   |           |           |           |
| <b>Filename = Endo-6g</b>                                    |   |   |           |           |           | <b>Filename = Exo-6g</b>                                     |   |   |           |           |           |
| <b>Calculation Type = SP</b>                                 |   |   |           |           |           | <b>Calculation Type = SP</b>                                 |   |   |           |           |           |
| <b>Calculation Method = RB3LYP</b>                           |   |   |           |           |           | <b>Calculation Method = RB3LYP</b>                           |   |   |           |           |           |
| <b>Basis Set = 6-31G</b>                                     |   |   |           |           |           | <b>Basis Set = 6-31G</b>                                     |   |   |           |           |           |
| <b>Charge = 0</b>                                            |   |   |           |           |           | <b>Charge = 0</b>                                            |   |   |           |           |           |
| <b>Spin = Singlet</b>                                        |   |   |           |           |           | <b>Spin = Singlet</b>                                        |   |   |           |           |           |
| <b>Solvation = None</b>                                      |   |   |           |           |           | <b>Solvation = None</b>                                      |   |   |           |           |           |
| <b>E(RB+HF-LYP) = -2347.451 Hartree</b>                      |   |   |           |           |           | <b>E(RB+HF-LYP) = -2347.3904 Hartree</b>                     |   |   |           |           |           |
| <b>Dipole Moment = 3.057454 Debye</b>                        |   |   |           |           |           | <b>Dipole Moment = 4.2068615 Debye</b>                       |   |   |           |           |           |
| <b>Nuclear repulsion energy = 4797.4608409484 Hartrees</b>   |   |   |           |           |           | <b>Nuclear repulsion energy = 4846.7105360983 Hartrees</b>   |   |   |           |           |           |
| <b>Point Group = C1</b>                                      |   |   |           |           |           | <b>Point Group = C1</b>                                      |   |   |           |           |           |
| <b>Job CPU time: 0 days 0 hours 6 minutes 12.0 seconds.</b>  |   |   |           |           |           | <b>Job CPU time: 0 days 0 hours 6 minutes 3.0 seconds.</b>   |   |   |           |           |           |

Table S6. DFT calculation table of Endo and Exo 6g.

## 6. Basic Crystallographic data of Compound 6g

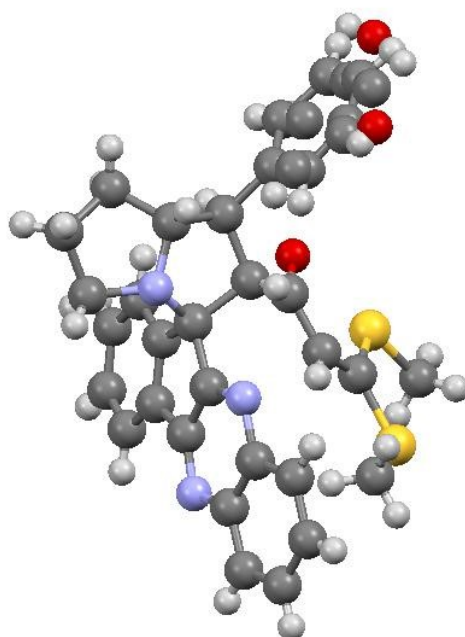

## (CCDC: 2504757)

Fig S57. SC-XRD 3D view data of Compound 6g.

|                        |                                 |                                   |                         |
|------------------------|---------------------------------|-----------------------------------|-------------------------|
| <b>Bond precision:</b> | C-C = 0.0094 Å                  | Wavelength=0.71073                |                         |
| <b>Cell:</b>           | a=22.317(5)<br>alpha=90         | b=22.317(5)<br>beta=90            | c=11.022(4)<br>gamma=90 |
| <b>Temperature:</b>    | 300 K                           |                                   |                         |
|                        | <b>Calculated</b>               | <b>Reported</b>                   |                         |
| Volume                 | 5490(3)                         | 5490(3)                           |                         |
| Space group            | I -4                            | I -4                              |                         |
| Hall group             | I -4                            | I -4                              |                         |
| Moiety formula         | C32 H28.45 N3 O2 S2 [+ solvent] | C32 H28.452 N3 O2 S2,<br>0.2[H2O] |                         |
| Sum formula            | C32 H28.45 N3 O2 S2 [+ solvent] | C32 H28.85 N3 O2.20 S2            |                         |
| Mr                     | 551.14                          | 554.75                            |                         |
| Dx, g cm <sup>-3</sup> | 1.334                           | 1.342                             |                         |
| Z                      | 8                               | 8                                 |                         |
| Mu (mm <sup>-1</sup> ) | 0.229                           | 0.230                             |                         |
| F000                   | 2315.6                          | 2332.0                            |                         |
| F000'                  | 2318.37                         |                                   |                         |
| h, k, lmax             | 29, 29, 14                      | 29, 29, 14                        |                         |
| Nref                   | 6842 [ 3598]                    | 6834                              |                         |
| Tmin, Tmax             | 0.930, 0.964                    |                                   |                         |
| Tmin'                  | 0.930                           |                                   |                         |
| Correction method=     | Not given                       |                                   |                         |
| Data completeness=     | 1.90/1.00                       | Theta(max)= 28.291                |                         |
|                        |                                 | wR2(reflections)= 0.2367(         |                         |
| R(reflections)=        | 0.0648( 4194)                   | 6834)                             |                         |
| S =                    | 1.162                           | Npar= 374                         |                         |

The following ALERTS were generated. Each ALERT has the format **test-name\_ALERT\_alert-type\_alert-level**.  
Click on the hyperlinks for more details of the test.

**Alert level C**

[PLAT220\\_ALERT\\_2\\_C](#) NonSolvent Resd 1 C Ueq(max)/Ueq(min) Range 3.4 Ratio  
[PLAT222\\_ALERT\\_3\\_C](#) NonSolvent Resd 1 H Uiso(max)/Uiso(min) Range 4.2 Ratio  
[PLAT242\\_ALERT\\_2\\_C](#) Low 'MainMol' Ueq as Compared to Neighbors of S002 Check [PLAT309\\_ALERT\\_2\\_C](#) Single Bonded Oxygen (C-O > 1.3 Ang) ..... O011 Check [PLAT340\\_ALERT\\_3\\_C](#) Low Bond Precision on C-C Bonds ..... 0.00942 Ang.  
[PLAT905\\_ALERT\\_3\\_C](#) Negative K value in the Analysis of Variance ... -4.534 Report  
**And 2 other PLAT905 Alerts** [More](#)  
 ...

**Alert level G**

[FORMU01\\_ALERT\\_2\\_G](#) There is a discrepancy between the atom counts in the \_chemical\_formula\_sum and the formula from the \_atom\_site\* data. Atom count from \_chemical\_formula\_sum: C32 H28.85 N3 O2.2 S2 Atom count from the \_atom\_site data: C32 H28.44699 N3 O2 S2  
[CELLZ01\\_ALERT\\_1\\_G](#) Difference between formula and atom\_site contents detected.  
[CELLZ01\\_ALERT\\_1\\_G](#) ALERT: Large difference may be due to a symmetry error - see SYMMG tests  
 From the CIF: \_cell\_formula\_units\_Z 8

From the CIF: `_chemical_formula_sum` C32 H28.85 N3 O2.20 S2 TEST:  
Compare cell contents of formula and `atom_site` data

| atom   | Z*formula | cif sites | diff | C |
|--------|-----------|-----------|------|---|
| 256.00 | 256.00    | 0.00      |      |   |
| H      | 230.80    | 227.58    | 3.22 |   |
| N      | 24.00     | 24.00     | 0.00 |   |
| O      | 17.60     | 16.00     | 1.60 |   |
| S      | 16.00     | 16.00     | 0.00 |   |

**PLAT002\_ALERT\_2\_G** Number of Distance or Angle Restraints on AtSite 14 Note

**PLAT007\_ALERT\_5\_G** Number of Unrefined Donor-H Atoms ..... 1 Report  
H0A

**PLAT041\_ALERT\_1\_G** Calc. and Reported SumFormula Strings Differ Please Check  
Calc: C32 H28.45 N3 O2 S2  
Rep.: C32 H28.85 N3 O2.20 S2

**PLAT042\_ALERT\_1\_G** Calc. and Reported MoietyFormula Strings Differ Please Check  
Calc: C32 H28.45 N3 O2 S2  
Rep.: C32 H28.452 N3 O2 S2, 0.2[H2O]

**PLAT072\_ALERT\_2\_G** SHELXL First Parameter in WGHT Unusually Large 0.11 Report

**PLAT171\_ALERT\_4\_G** The CIF-Embedded .res File Contains EADP Records 6 Report

**PLAT176\_ALERT\_4\_G** The CIF-Embedded .res File Contains SADI Records 17 Report

**PLAT191\_ALERT\_3\_G** A Non-default SADI Restraint Value has been used 0.0400 Report

**And 9 other PLAT191 Alerts** [More](#)

...

**PLAT301\_ALERT\_3\_G** Main Residue Disorder .....(Resd 1) 15% Note

**PLAT304\_ALERT\_4\_G** Non-Integer Number of Atoms in. (Resd 1) 67.45 Check

**PLAT410\_ALERT\_2\_G** Short Intra H...H Contact H00K ..H1 1.98 Ang.

x,y,z = 1\_555 Check

**PLAT605\_ALERT\_4\_G** Largest Solvent Accessible VOID in the Structure 25 A\*\*3

**PLAT720\_ALERT\_4\_G** Number of Unusual/Non-Standard Labels ..... 71 Note

S001 S002 O003 N004 N005 N006 C007 C008  
C009 C00A H00A C00B H00B C00C C00D C00E  
C00F C00G C00H H00H C00I C00J H00J C00K  
H00K C00L H00L C00M H00C H00D C00N H00N  
C00O H00E H00F C00P H00P C00Q C00R H00R  
C00S H00G H00I C00T H00T C00U H00U C00V  
H00V C00W C00X H00X C00Y H00Y C00Z H00Z  
C010 H01A H01B H01C O011 C012 H012 C014  
H01D H01E H01F C0 H0 O0 H0A

**PLAT792\_ALERT\_1\_G** Model has Chirality at C008 (Polar SpGr) R Verify

**And 3 other PLAT792 Alerts** [More](#)

...

**PLAT860\_ALERT\_3\_G** Number of Least-Squares Restraints ..... 17 Note

**PLAT868\_ALERT\_4\_G** ALERTS Due to the Use of `_smtbx_masks` Suppressed ! Info

**PLAT910\_ALERT\_3\_G** Missing FCF Reflection(s) Below Theta(Min)[Deg]= 2.06 Note

1 1 0, 0 2 0,

**PLAT933\_ALERT\_2\_G** Number of HKL-OMIT Records in Embedded .res File 2 Note

0 2 0, 3 3 0,

**PLAT969\_ALERT\_5\_G** The 'Henn et al.' R-Factor-gap value ..... 8.506 Note

Predicted wR2: Based on SigI\*\*2 2.78 or SHELX Weight 20.37

**PLAT978\_ALERT\_2\_G** Number C-C Bonds with Positive Residual Density. 0 Info

0 **ALERT level A** = Most likely a serious problem - resolve or explain

0 **ALERT level B** = A potentially serious problem, consider carefully

8 **ALERT level C** = Check. Ensure it is not caused by an omission or oversight

35 **ALERT level G** = General information/check it is not something unexpected

8 ALERT type 1 CIF construction/syntax error, inconsistent or missing data

9 ALERT type 2 Indicator that the structure model may be wrong or deficient

18 ALERT type 3 Indicator that the structure quality may be low

6 ALERT type 4 Improvement, methodology, query or suggestion  
2 ALERT type 5 Informative message, check

It is advisable to attempt to resolve as many as possible of the alerts in all categories. Often the minor alerts point to easily fixed oversights, errors and omissions in your CIF or refinement strategy, so attention to these fine details can be worthwhile. It is up to the individual to critically assess their own results and, if necessary, seek expert advice.

**PLATON version of 26/09/2025; check.def file version of 20/09/2025**

**2. duplicate check**  
**No duplication found**

**Table S7.** Single Crystal XRD data of Compound **6g**.

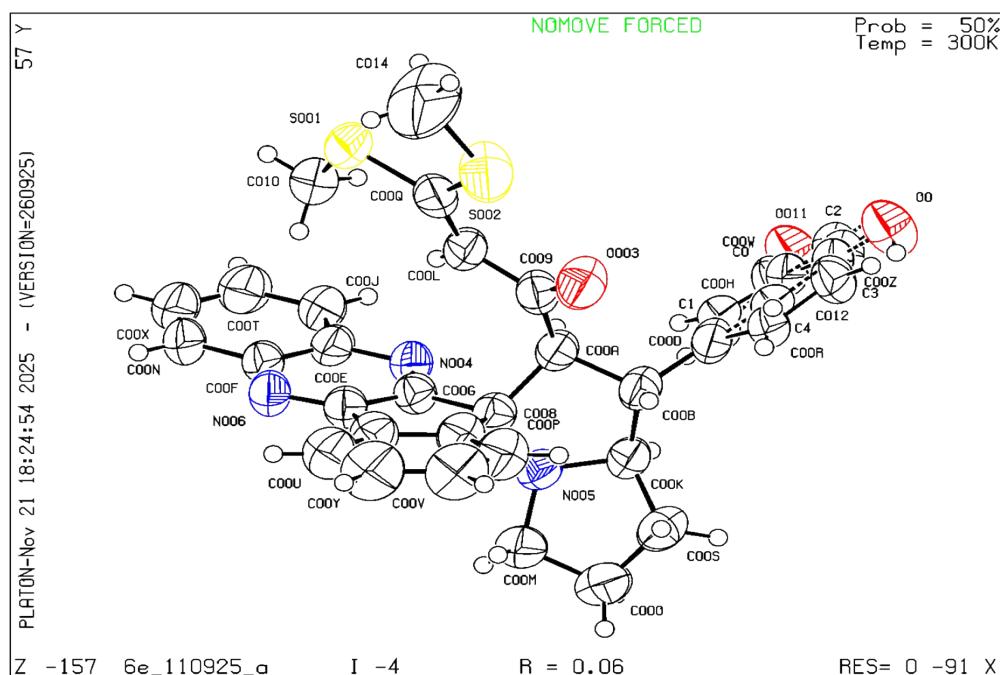

The single crystal X-ray diffraction data for **6g** (CCDC 2504757) showed an extra oxygen atom, which was identified as a disordered lattice water molecule. Including this solvent molecule in the final refinement significantly improved the data quality (*R*-factor), which is not a serious threat.

**Fig S58.** SC-XRD data of Compound **6g**.

## 7. References

- Zheng, Y., Tice, C. M. and Singh, S. B., *Bioorg. Med. Chem. Lett.*, 2014, **24**, 3673–3682.
- Melhado, A. D., Brenzovitch, W. E., Lackner, A. D. and Toste, F. D., *J. Am. Chem. Soc.*, 2010, **132**, 8885–8887.
- (a) Filatov, A. S., Knyazev, N. A., Ryazantsev, M. N., Suslonov, V. V., Larina, A. G., Molchanov, A. P., Kostikov, R. R., Boitsov, V. M. and Stepanov, A. V., *Org. Chem. Front.*, 2018, **5**, 595; (b) Akondi, A. M., Mekala, S., Kantam, M. L., Trivedi, R., Chowhan, L. R. and Das, A., *New J. Chem.*, 2017, **41**, 873; (c) Arumugam, N., Almansour, A. I., Kumar, R. S., Kotresha, D., Saiswaroop, R. and Venketesh, S., *Bioorg. Med. Chem.*, 2019, **27**, 2621.
- (a) Melhado, A. D., Brenzovitch, W. E., Lackner, A. D. and Toste, F. D., *J. Am. Chem. Soc.*, 2010, **132**, 8885–8887; (b) Adams, G. L., Carroll, P. J. and Smith, A. B., *J. Am. Chem. Soc.*, 2013, **135**, 519–528; (c) Snyder, S. A., Breazzano, S. P., Ross, A. G., Lin, Y. and Zografos, A. L., *J. Am. Chem. Soc.*, 2009, **131**, 1753–1765; (d) Yoder, R. A. and Johnston, J. N., *Chem. Rev.*, 2005, **105**, 4730–4756; (e) Sutherland, J. K., in *Comprehensive Organic Synthesis*, ed. B. M. Trost, Pergamon Press: Elmsford, NY, 1991, vol. 1, pp. 341–377.
- World Health Organization, *Global Antimicrobial Resistance and Use Surveillance System (GLASS) Report 2021*, WHO, Geneva, 2021.
- Reuter, S., Gupta, S. C., Chaturvedi, M. M. and Aggarwal, B. B., *Free Radic. Biol. Med.*, 2010, **49**, 1603–1616.
- (a) Dhanalakshmi, P., Babu, S. S., Thimmarayaperumal, S. and Shanmugam, S., *RSC Adv.*, 2015, **5**, 33705–33719; (b) Thimmarayaperumal, S. and Shanmugam, S., *New J. Chem.*, 2018, **42**, 4061–4066; (c) Saravana Mani, K., Kaminsky, W. and Rajendran, S. P., *New J. Chem.*, 2018, **42**, 301–310.
- (a) Zhou, F., Liu, Y. L. and Zhou, J., *Adv. Synth. Catal.*, 2010, **352**, 1381–1407; (b) Singh, G. S. and Desta, A. Y., *Chem. Rev.*, 2012, **112**, 6104–6105; (c) Morteza, S., *Chem. Rev.*, 2012, **112**, 3508–3549.
- (a) Nishtala, V. B., Nanubolu, J. B. and Basavoju, S., *Res. Chem. Intermed.*, 2017, **43**, 1365–1381; (b) Banerjee, B., Sharma, A., Kaur, M. and Singh, A., *De Gruyter*, 2023, **5**, 181; (c) Preethi, R. K., Kannadasan, S. and Shanmugam, P., *Tetrahedron Lett.*, 2023, **120**, 154448.
- Rao, P. H. S. and Sivakumar, S., *Beilstein J. Org. Chem.*, 2007, **3**, No. 31.
- Myrboh, B., Asokan, C. V., Ila, H. and Junjappa, H., *Synthesis*, 1984, 50–51.
- (a) Ganem, B., *Acc. Chem. Res.*, 2009, **42**, 463–472; (b) Padwa, A., *Chem. Soc. Rev.*, 2009, **38**, 3072–3081; (c) Dömling, A., *Chem. Rev.*, 2006, **106**, 17–89; (d) D'Souza, D. M. and Müller, T. J. J., *Chem. Soc. Rev.*, 2007, **36**, 1095–1108; (e) Tietze, L. F. and Haunert, F., in *Stimulating Concepts in Chemistry*, ed. F. Vögtle, J. F. Stoddart and M. Shibasaki, Wiley-VCH: Weinheim, 2000, pp. 39–64; (f) Tejedor, D. and Garcia-Tellado, F., *Chem. Soc. Rev.*, 2007, **36**, 484–491.
- (a) Etman, H. A., Metwally, H. M., Elkasaby, M. M., Khalil, A. M. and Metwally, M. A., *Am. J. Org. Chem.*, 2011, **1**, 10–13; (b) Singh, R., Bhardwaj, D. and Saini, M. R., *RSC Adv.*, 2021, **11**, 4760–4804.
- Alshammari, M. B., Aly, A. A., Ahmad, A., Brown, A. B. and Mohamed, A. H., *RSC Adv.*, 2023, **13**, 32786–32823.

15. Ghosh, D., Molla, S. A., Aich, S., Ghosh, N. N., Khamarui, S. and Maiti, D. K., *J. Org. Chem.*, 2025, **90**, 14012–14026.
16. Frisch, M. J., Trucks, G. W., Schlegel, H. B. *et al.*, *Gaussian 16, Revision B.01*, Gaussian, Inc., Wallingford, CT, 2016.
17. Zhou, Y. *et al.*, *Eur. J. Med. Chem.*, 2020, **200**, 112436.
18. Nagarajan, R., Sankar, S. and Ponnuraj, K., *Microb. Pathog.*, 2019, **127**, 359–367.
19. Eisenberg, P., Albert, L., Teuffel, J. *et al.*, *Front. Microbiol.*, 2022, **13**, 802427.
20. Harding, C. J., Bischoff, M. and Bergkessel, M., *Nat. Chem. Biol.*, 2023, **19**, 1158–1166.
21. Morris, G. M., Huey, R. and Lindstrom, W., *J. Comput. Chem.*, 2009, **30**, 2785–2791.
22. CLSI, *Performance Standards for Antimicrobial Susceptibility Testing, 31st ed.*, Clinical and Laboratory Standards Institute, Wayne, PA, 2021.
23. Blois, M. S., *Nature*, 1958, **181**, 1199–1200.
